# Supplementary material
Source: PubMed Central journal article supplement (PMC2632679)

## Sample Information

SampleName

Vial 1

Injection 43

Injection Volume 10.00 ul

Channel 2487Channel 2

Run Time 20.0 Minutes

Sample Type Unknown

Date Acquired 1/12/2006 11:16:43 AM

Acq Method Set 2%iPrOH 1mpm

Processing Method 1

Date Processed 12/15/2006 4:37:17 PM

### Auto-Scaled Chromatogram

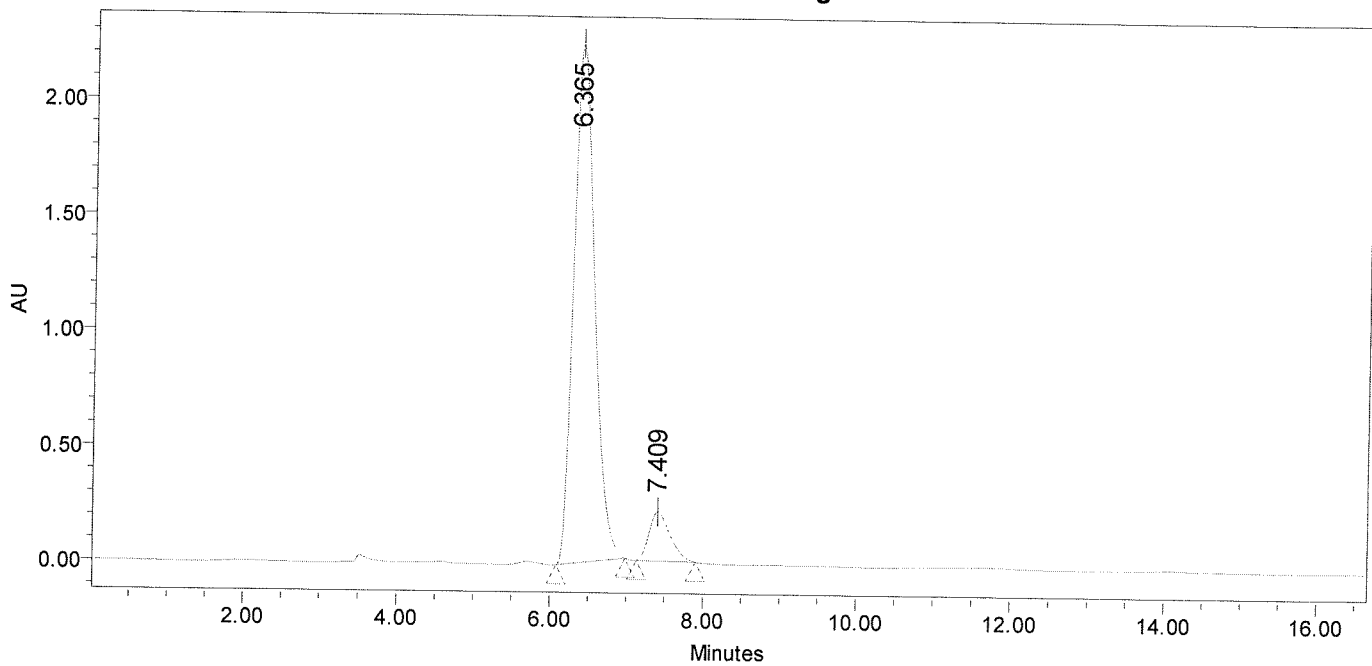

### Peak Results

|   | Name | RT    | Area     | % Area |
|---|------|-------|----------|--------|
| 1 |      | 6.365 | 42732730 | 91.32  |
| 2 |      | 7.409 | 4063413  | 8.68   |

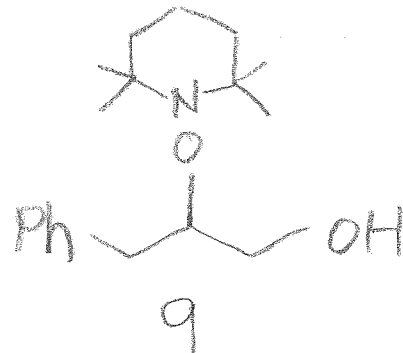

## Sample Information

SampleName

Vial 1  
Injection 44  
Injection Volume 10.00 ul  
Channel 2487Channel 2  
Run Time 20.0 Minutes

Sample Type Unknown  
Date Acquired 1/12/2006 11:34:21 AM  
Acq Method Set 2%iPrOH 1rpm  
Processing Method 1  
Date Processed 12/15/2006 5:03:45 PM

### Auto-Scaled Chromatogram

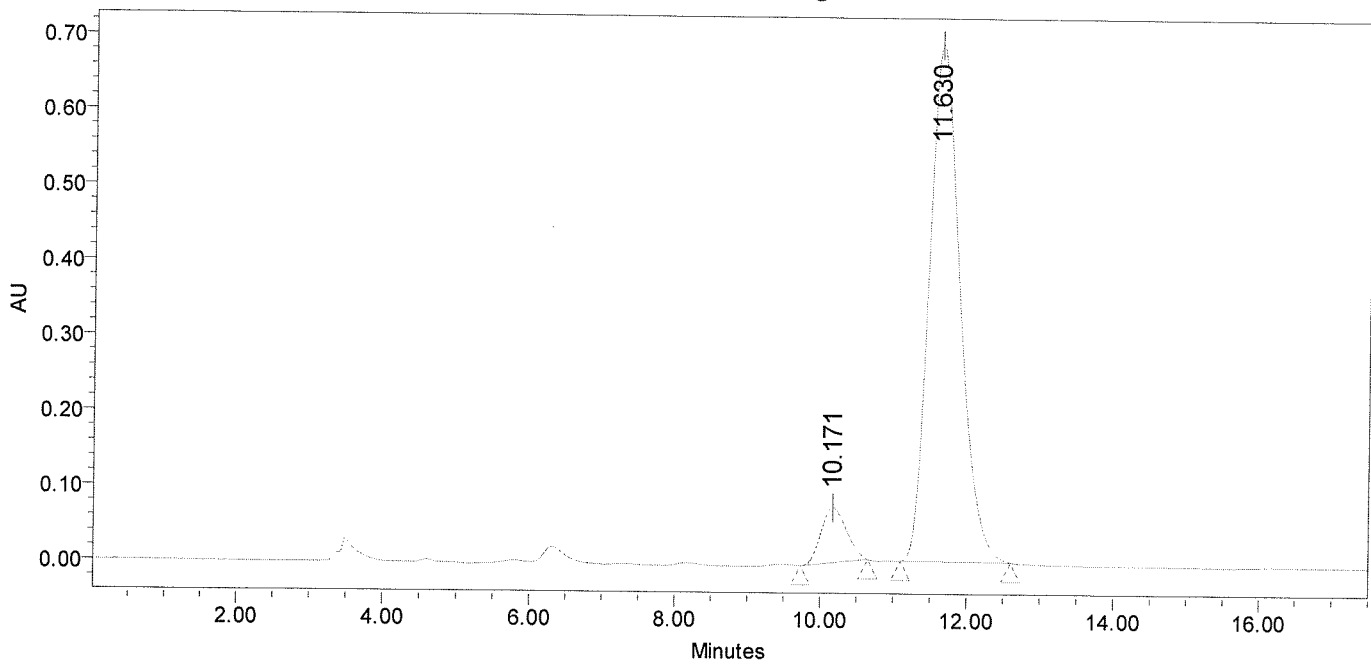

### Peak Results

|   | Name | RT     | Area     | % Area |
|---|------|--------|----------|--------|
| 1 |      | 10.171 | 1772153  | 8.05   |
| 2 |      | 11.630 | 20238803 | 91.95  |

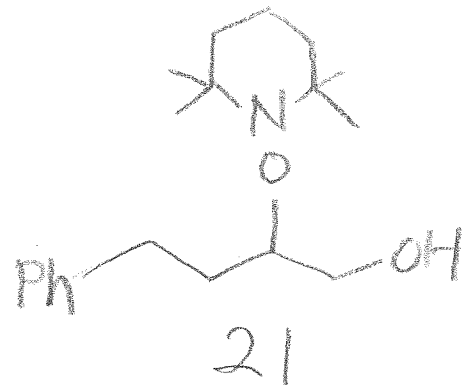

### Sample Information

|                  |               |                   |                       |
|------------------|---------------|-------------------|-----------------------|
| SampleName       |               | Sample Type       | Unknown               |
| Vial             | 1             | Date Acquired     | 1/12/2006 7:37:28 PM  |
| Injection        | 2             | Acq Method Set    | 4%iPrOH 1mpm          |
| Injection Volume | 5.00 ul       | Processing Method | 1                     |
| Channel          | 2487Channel 2 | Date Processed    | 12/15/2006 4:58:04 PM |
| Run Time         | 25.0 Minutes  |                   |                       |

### Auto-Scaled Chromatogram

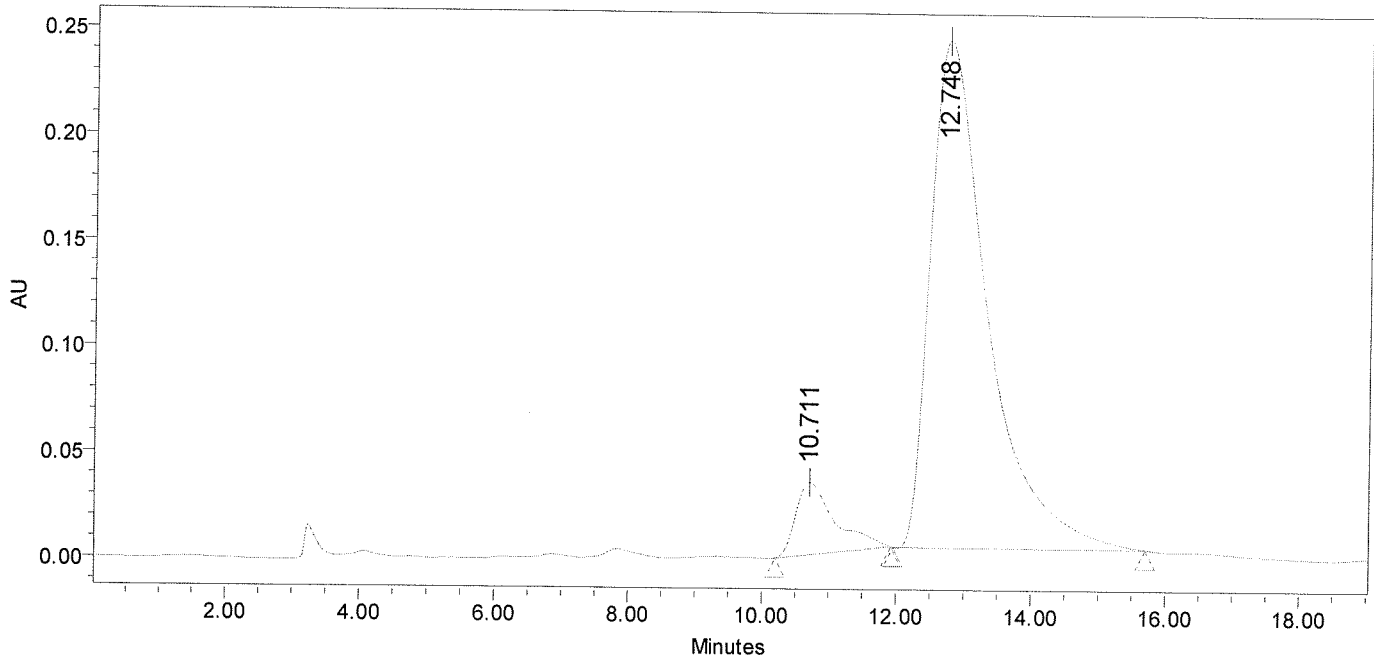

#### Peak Results

| Name | RT     | Area     | % Area |
|------|--------|----------|--------|
| 1    | 10.711 | 1389088  | 8.85   |
| 2    | 12.748 | 14305199 | 91.15  |

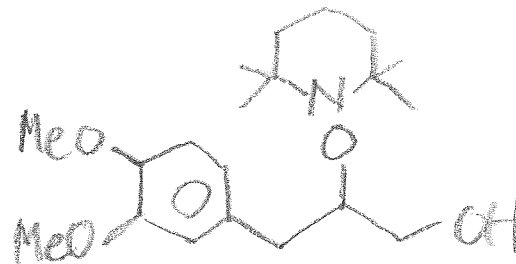

23

## Sample Information

SampleName

Sample Type Unknown

Vial 1

Date Acquired 7/29/2006 3:51:25 PM

Injection 6

Acq Method Set 4%iPrOH 2rpm

Injection Volume 5.00 ul

Processing Method 1

Channel 2487Channel 2

Date Processed 12/15/2006 5:20:13 PM

Run Time 60.0 Minutes

### Auto-Scaled Chromatogram

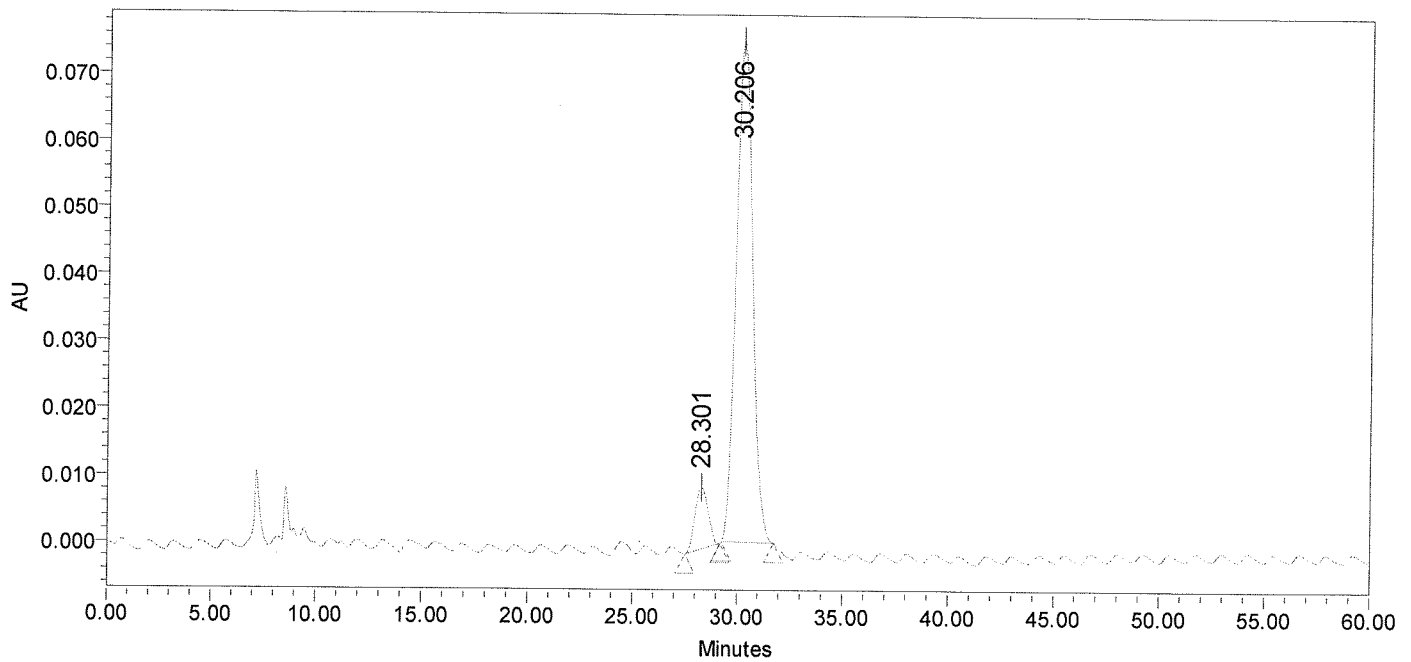

### Peak Results

|   | Name | RT     | Area    | % Area |
|---|------|--------|---------|--------|
| 1 |      | 28.301 | 402813  | 8.92   |
| 2 |      | 30.206 | 4114448 | 91.08  |

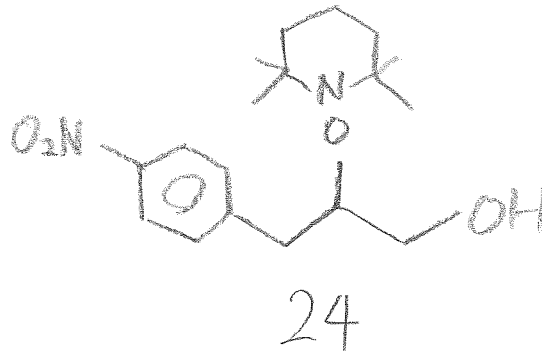

### Sample Information

|                  |               |                   |                       |
|------------------|---------------|-------------------|-----------------------|
| SampleName       |               | Sample Type       | Unknown               |
| Vial             | 1             | Date Acquired     | 1/12/2006 12:47:53 PM |
| Injection        | 46            | Acq Method Set    | 1% iPrOH 1mpmH3       |
| Injection Volume | 10.00 ul      | Processing Method | 1                     |
| Channel          | 2487Channel 2 | Date Processed    | 12/15/2006 4:21:59 PM |
| Run Time         | 20.0 Minutes  |                   |                       |

### Auto-Scaled Chromatogram

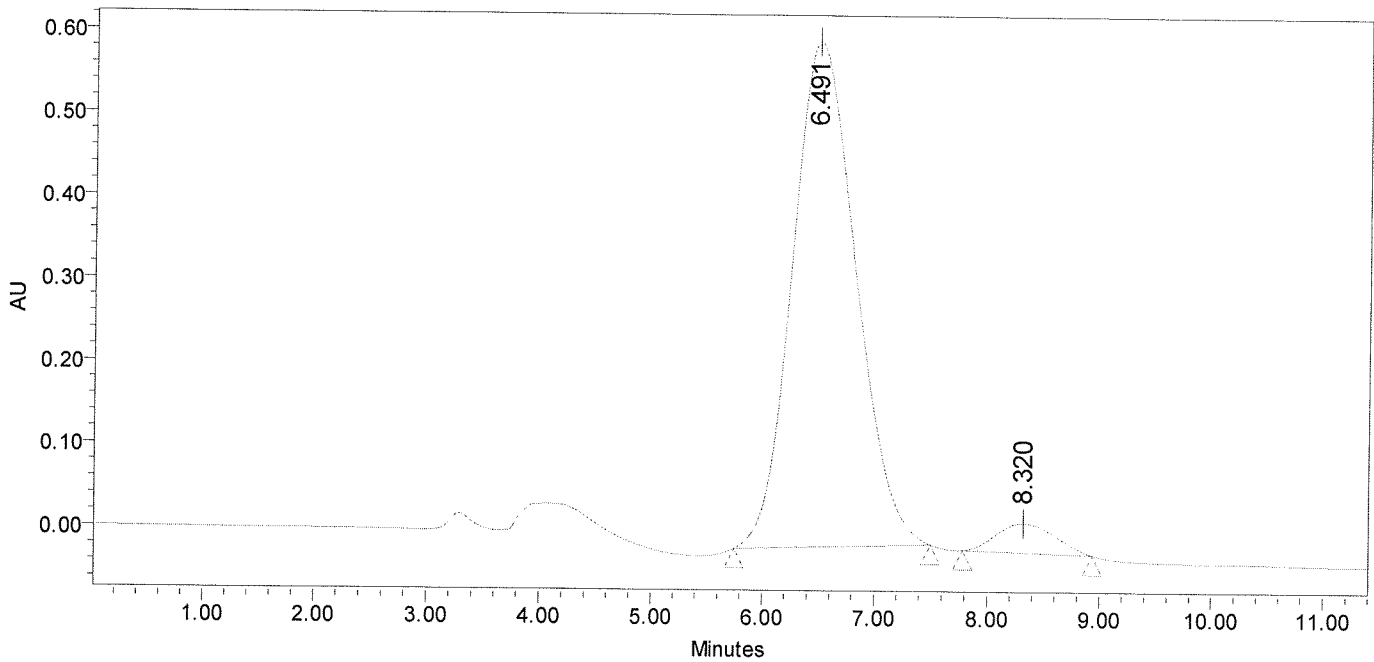

#### Peak Results

|   | Name | RT    | Area     | % Area |
|---|------|-------|----------|--------|
| 1 |      | 6.491 | 24039342 | 95.00  |
| 2 |      | 8.320 | 1266093  | 5.00   |

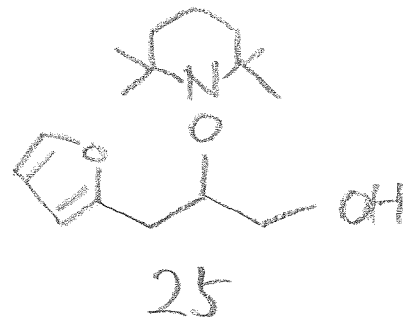

Supplement: NIHMS63734-supplement-1si20061222_03.pdf [file NIHMS63734-supplement-1si20061222_03.pdf]
