# Supplementary material
Source: PubMed Central journal article supplement (PMC2632679)

4-(4-Nitrophenyl)butylaldehyde  
Pulse Sequence: szpu1

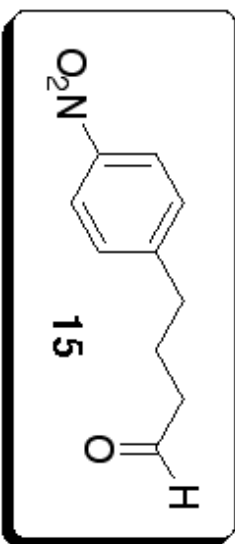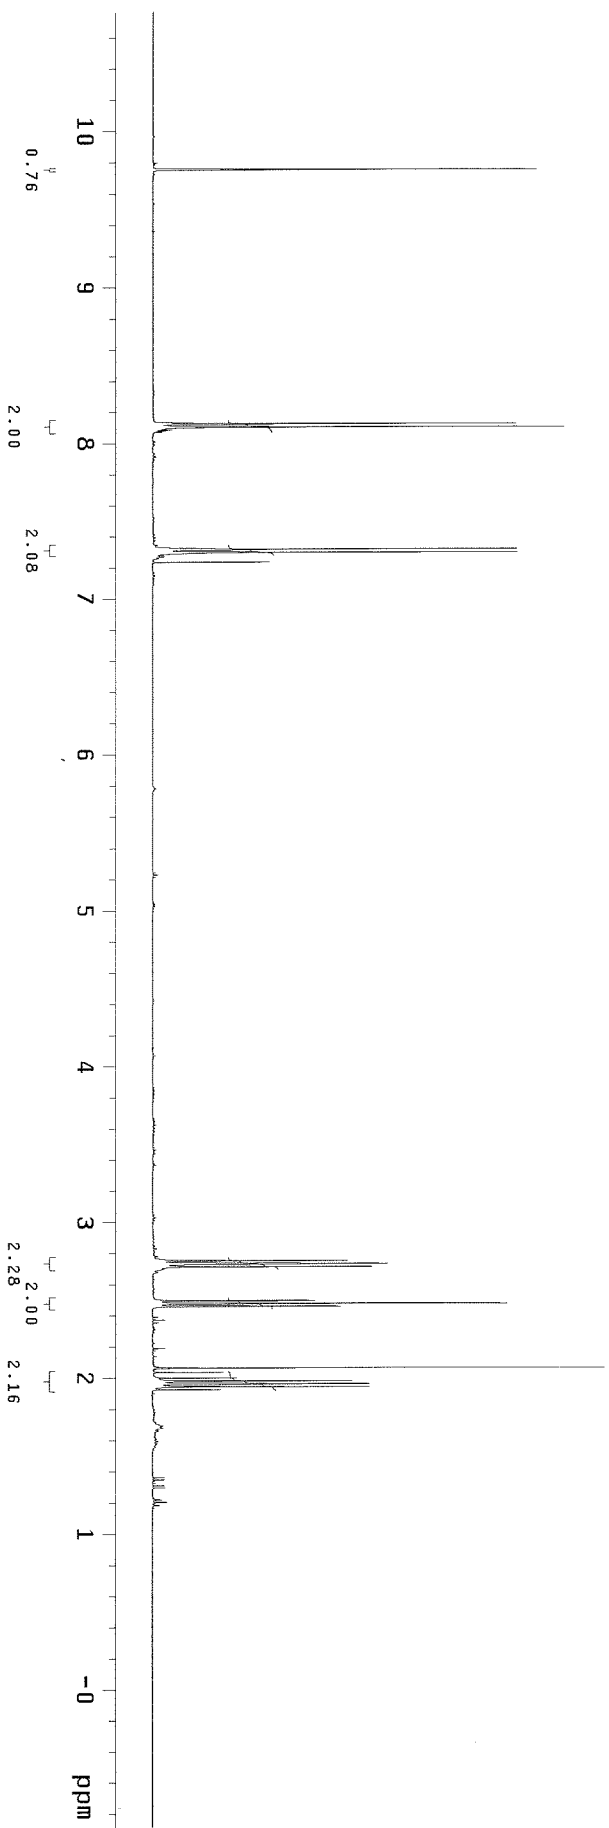

4-(4-Nitrophenyl)butanal  
Pulse Sequence: szpu1

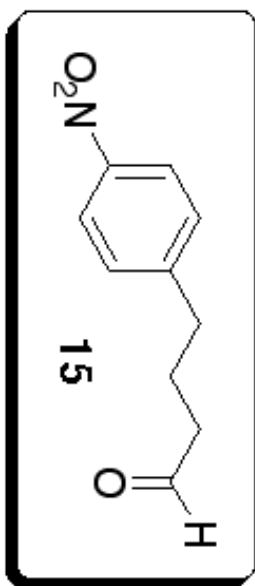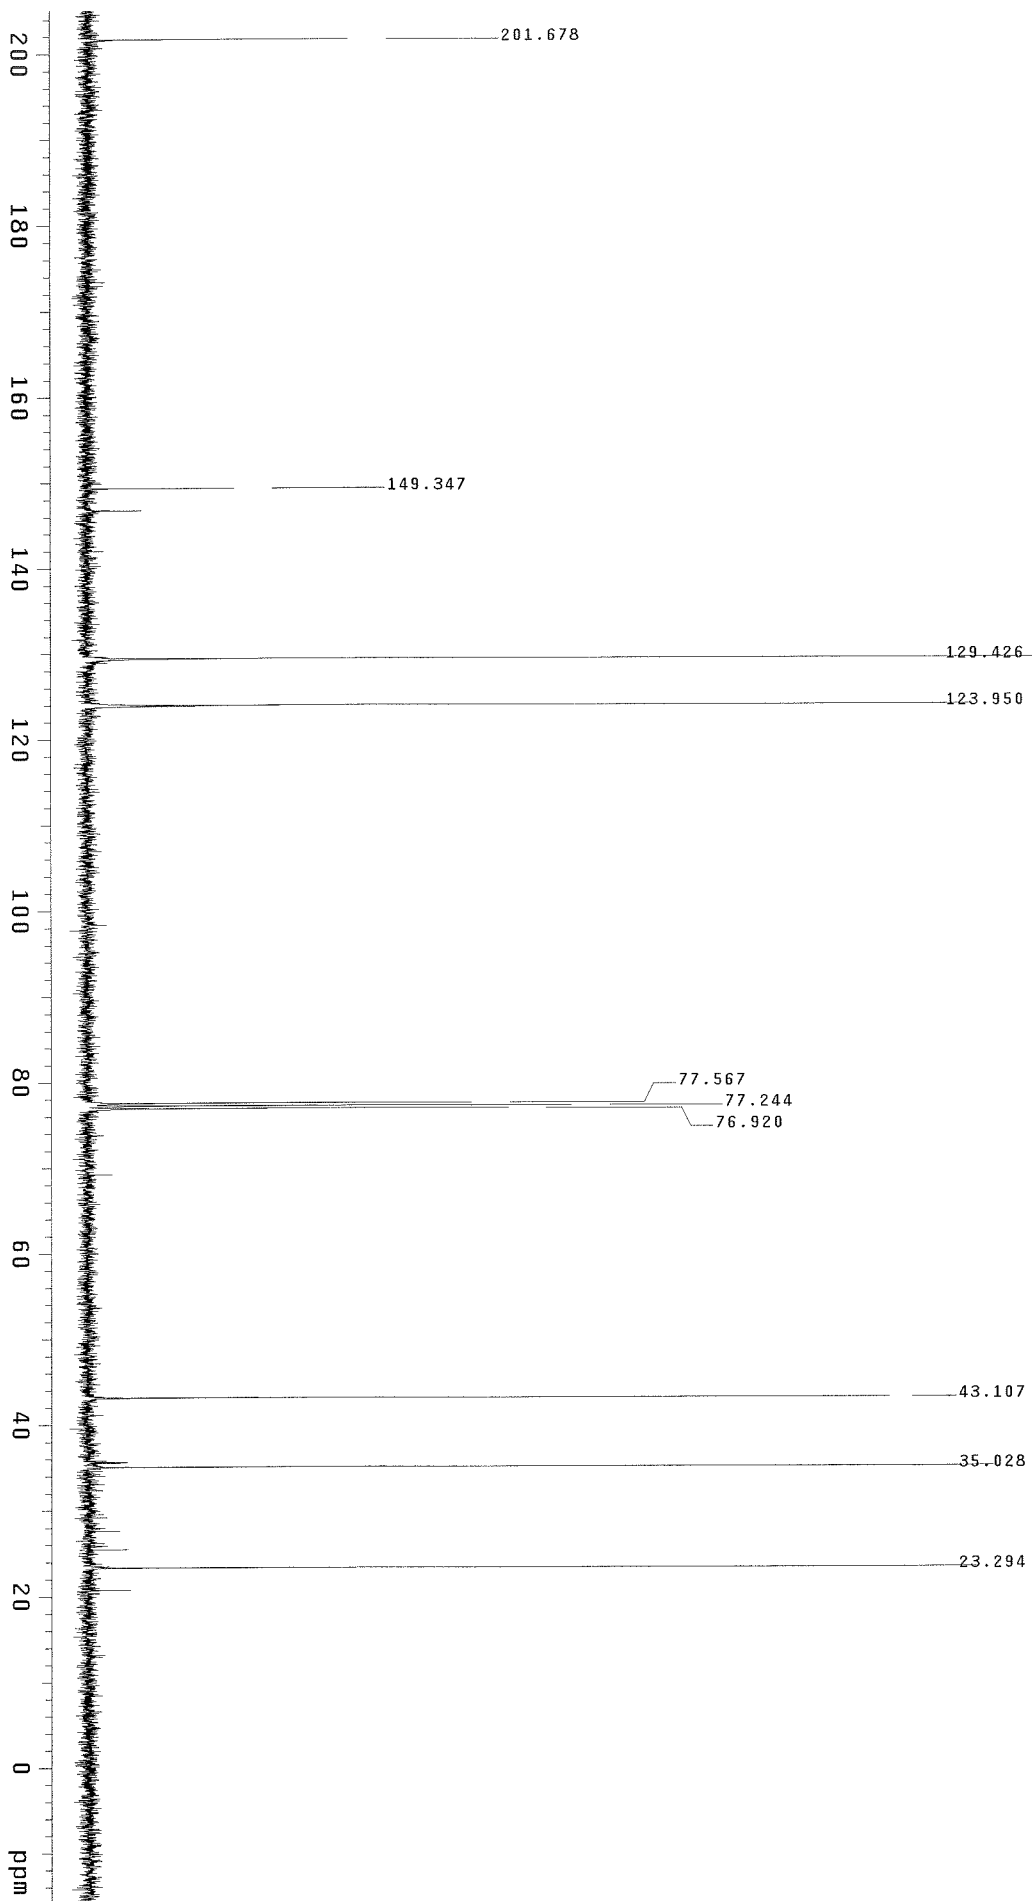

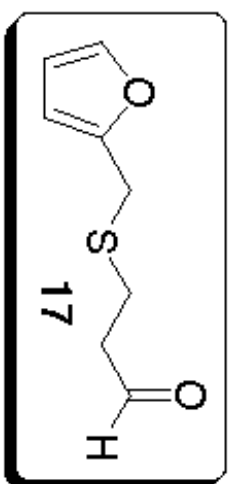

fury1GH2SCH2CH2CHO

Sample directory: proton=test\_02Mar2000

File: PROTON

Pulse Sequence: szpu1

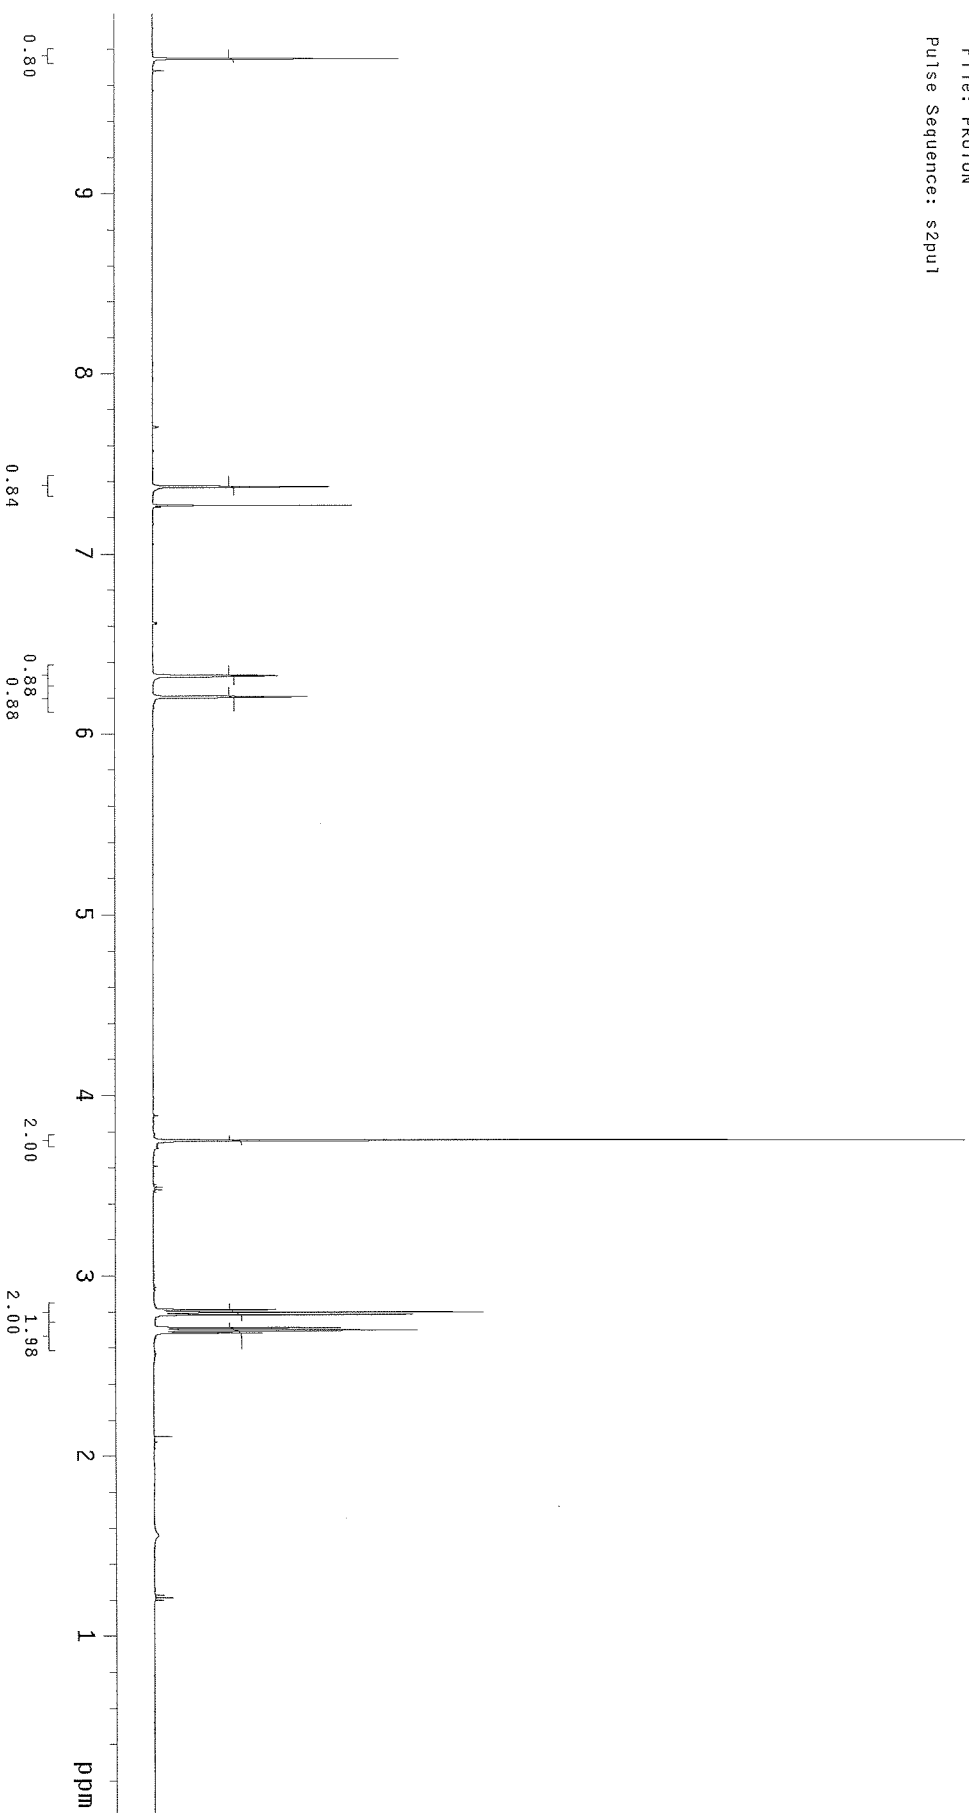

fury1CH2SCH2CH2CHO

Sample directory: eb-chloroform\_01Mar-2000

File: CARBON

Pulse Sequence: szpu1

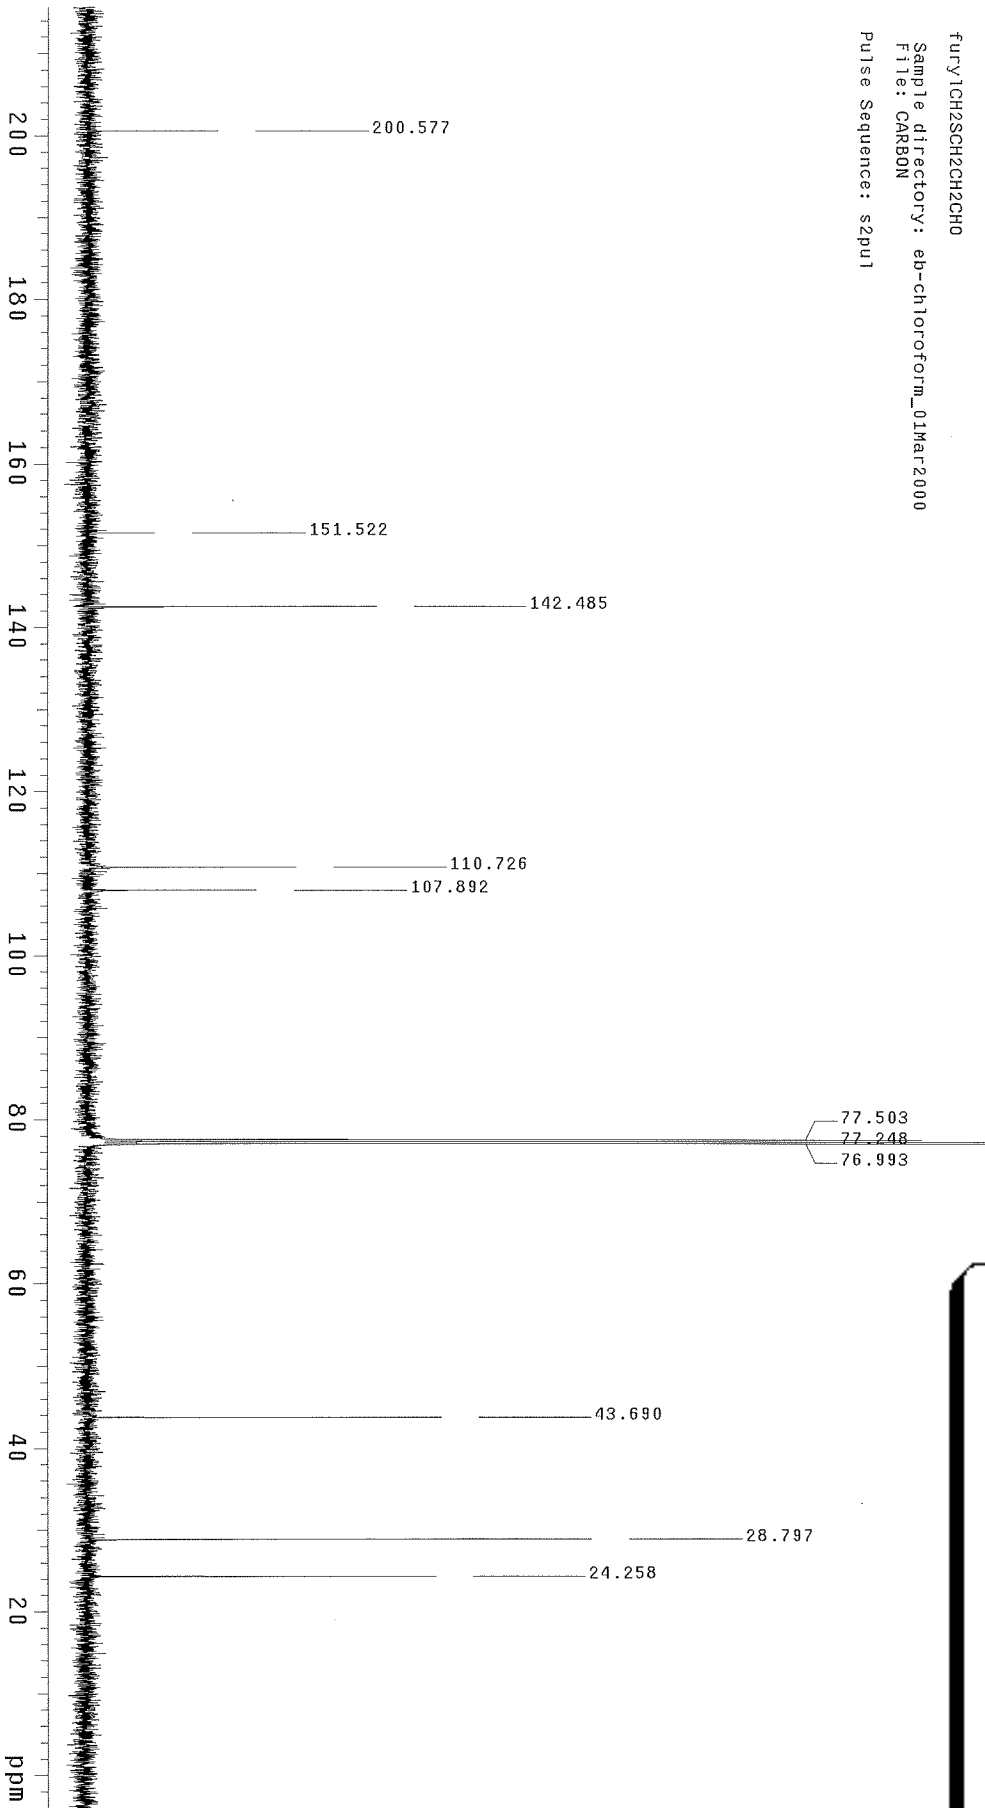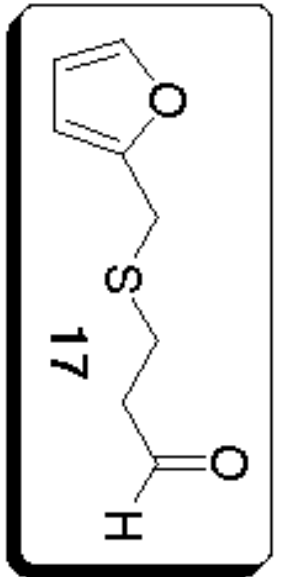

PhCH2CHTEMPPOCH2OH

Pulse Sequence: s2pu1

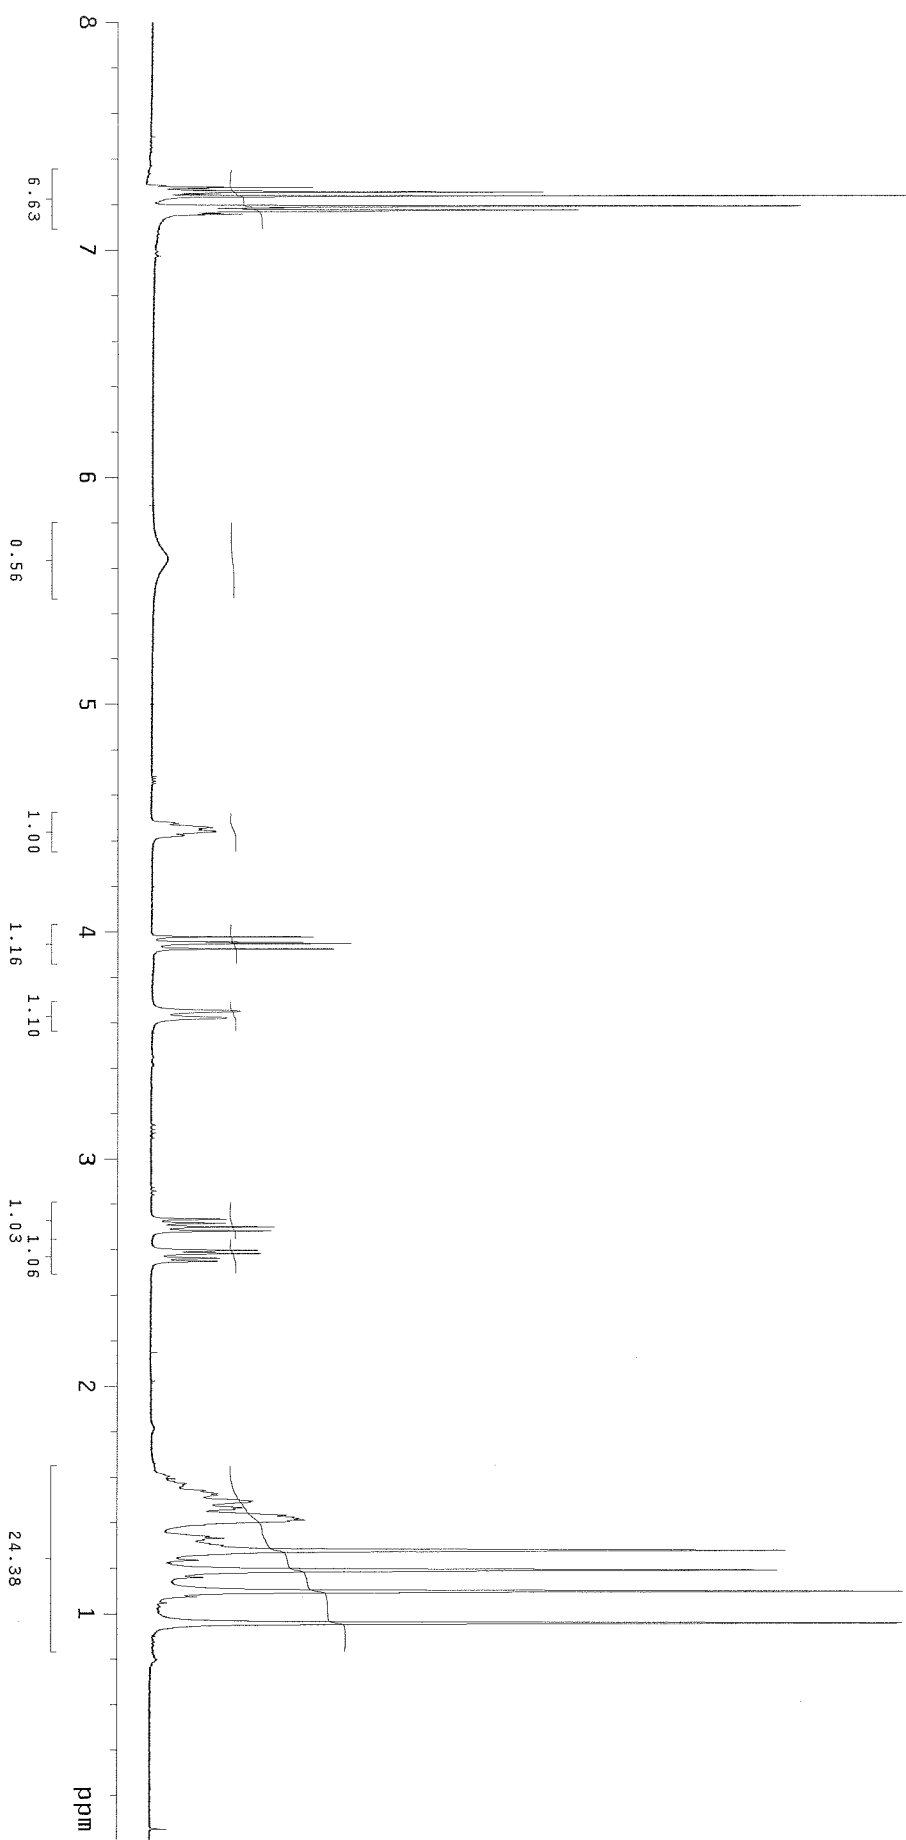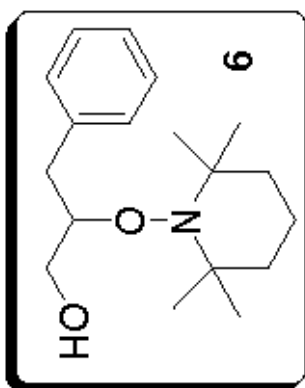

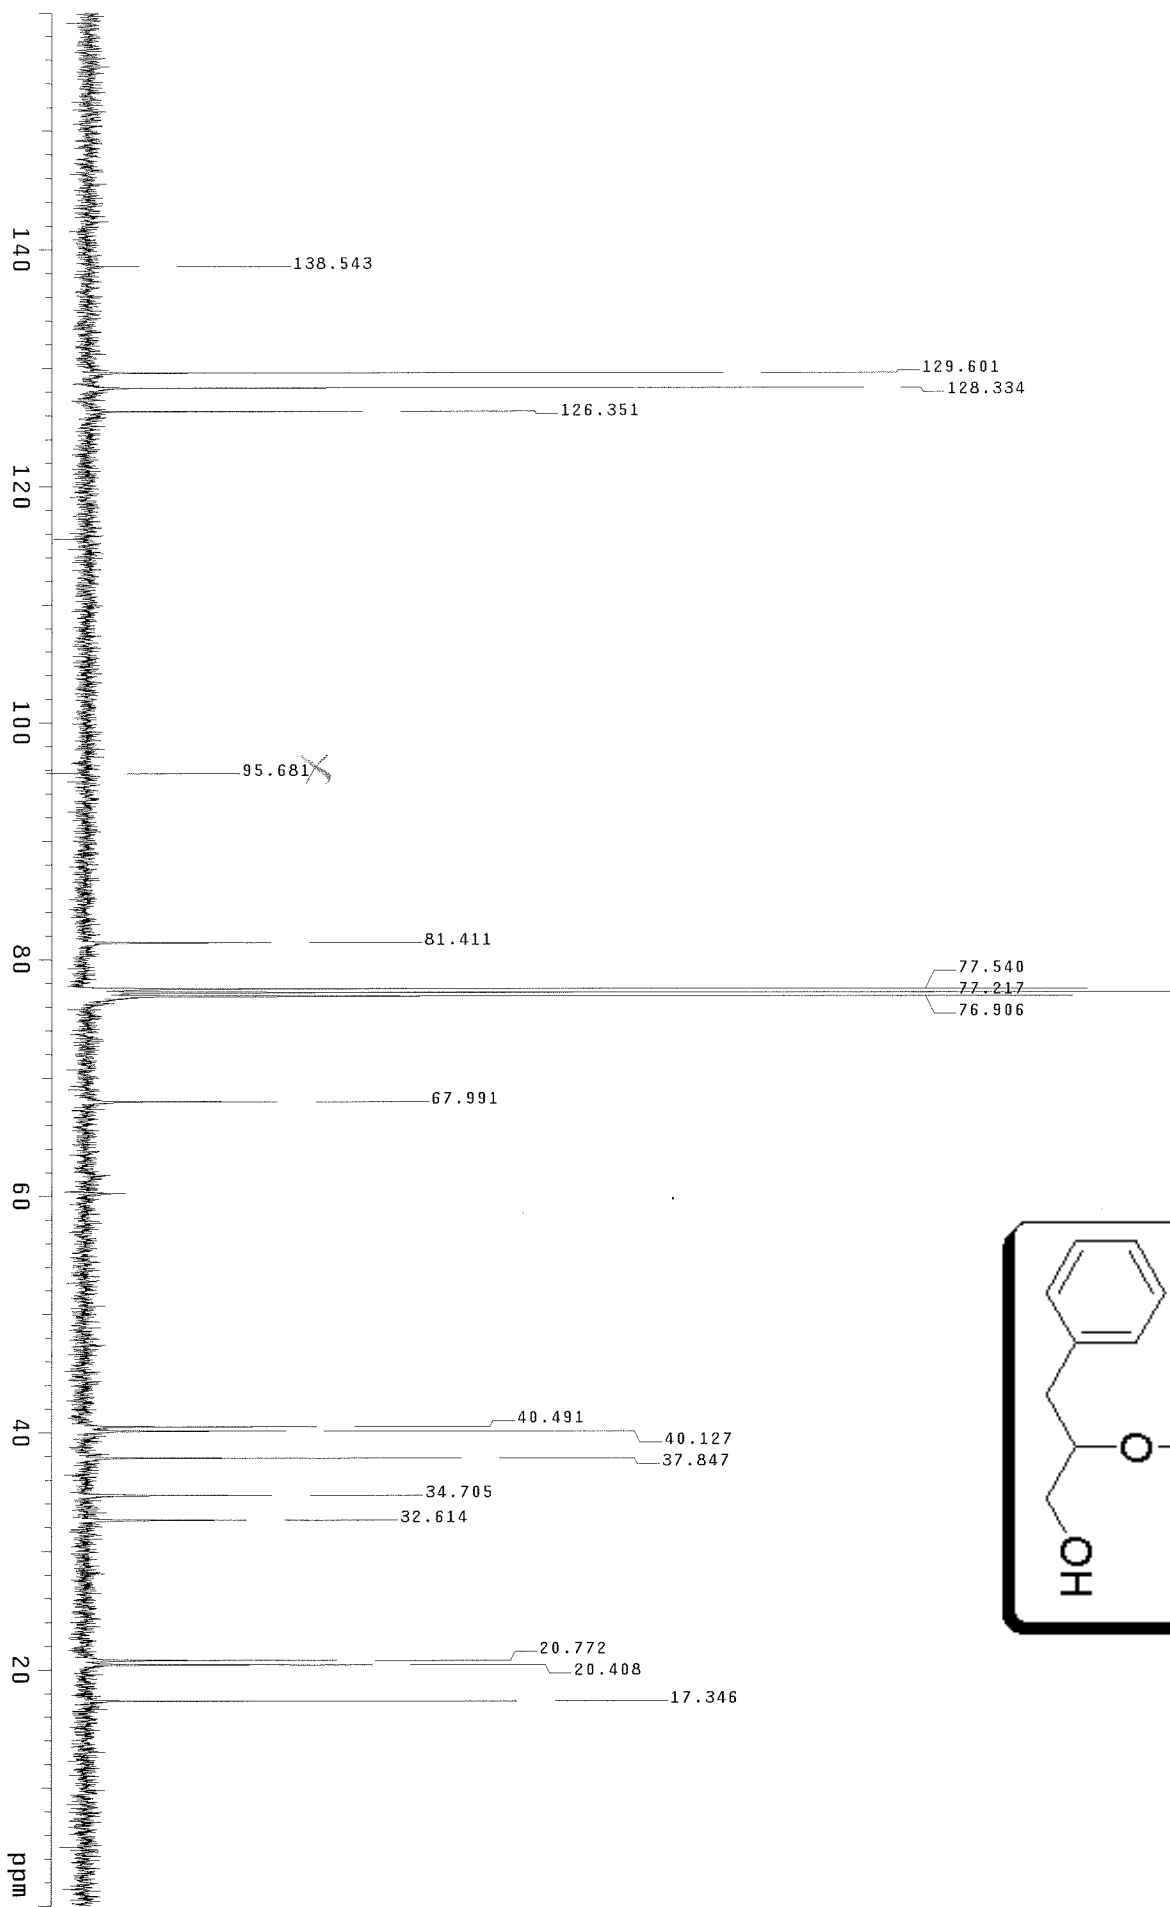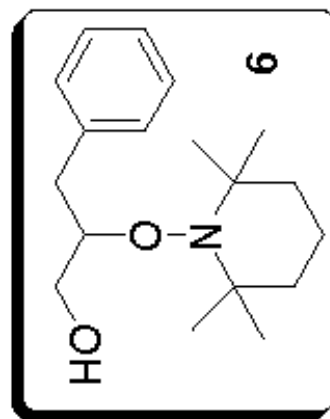

PHCHTEMP0CH2QH

Pulse Sequence: s2pu1

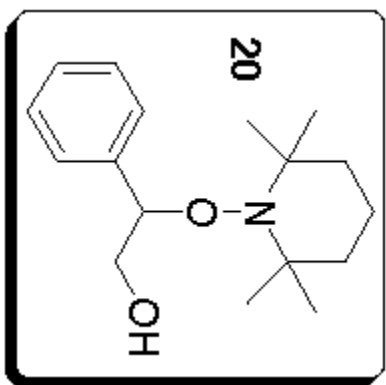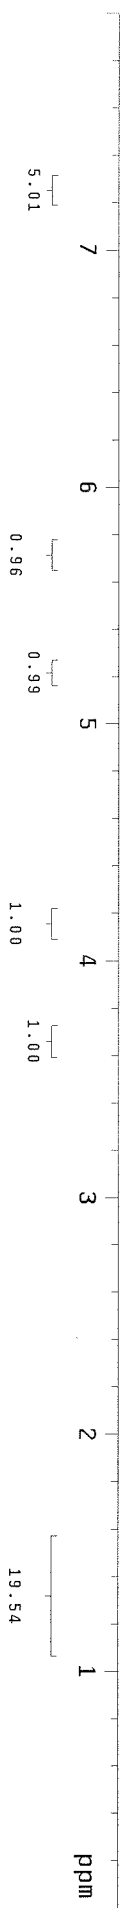

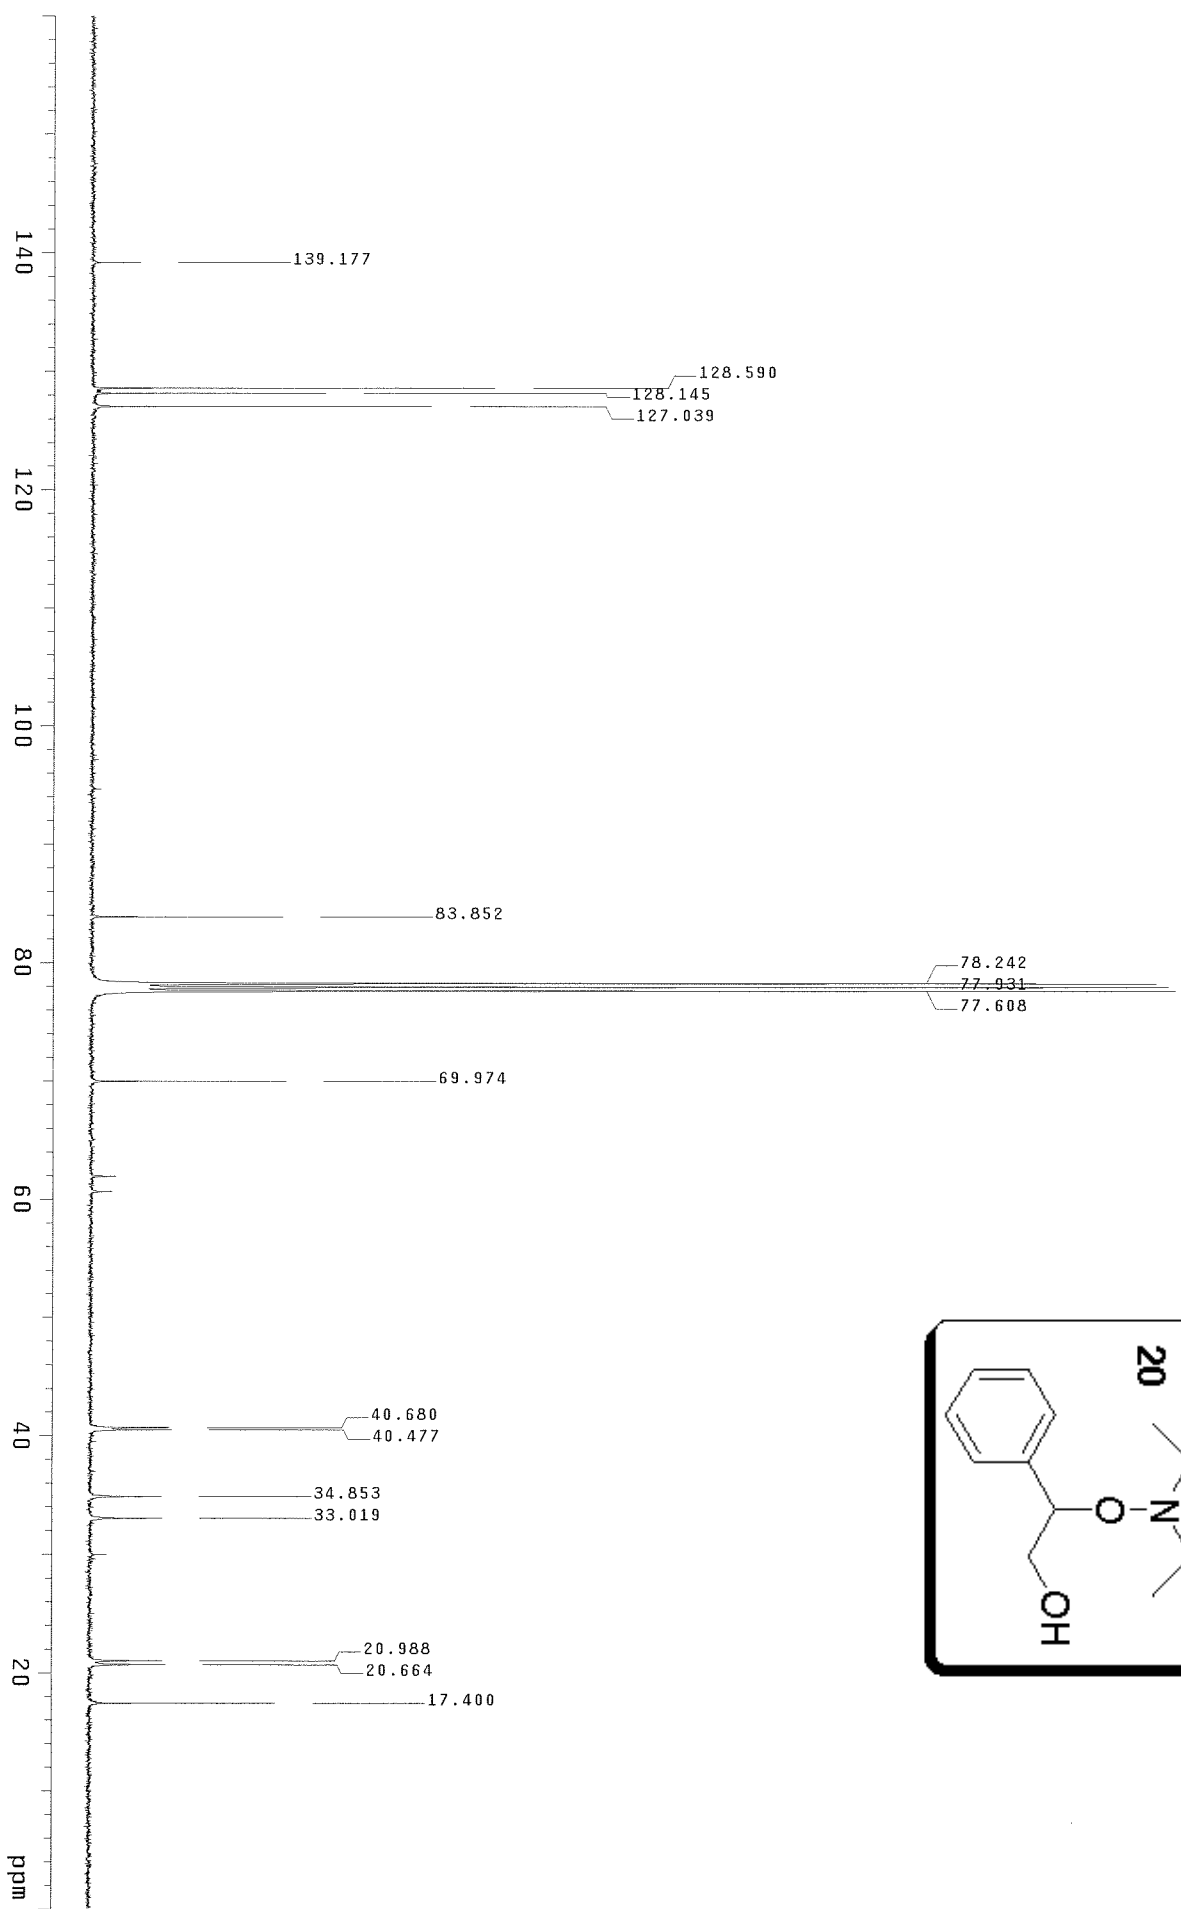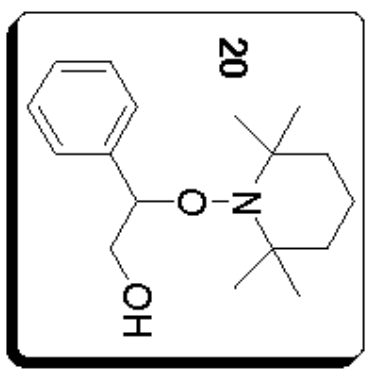



PHCH2CH2CHTEMPOCH2OH

Sample directory: proton=test\_02Mar2000

Pulse Sequence: s2pu1

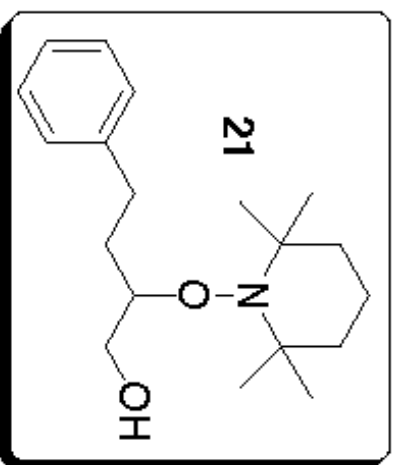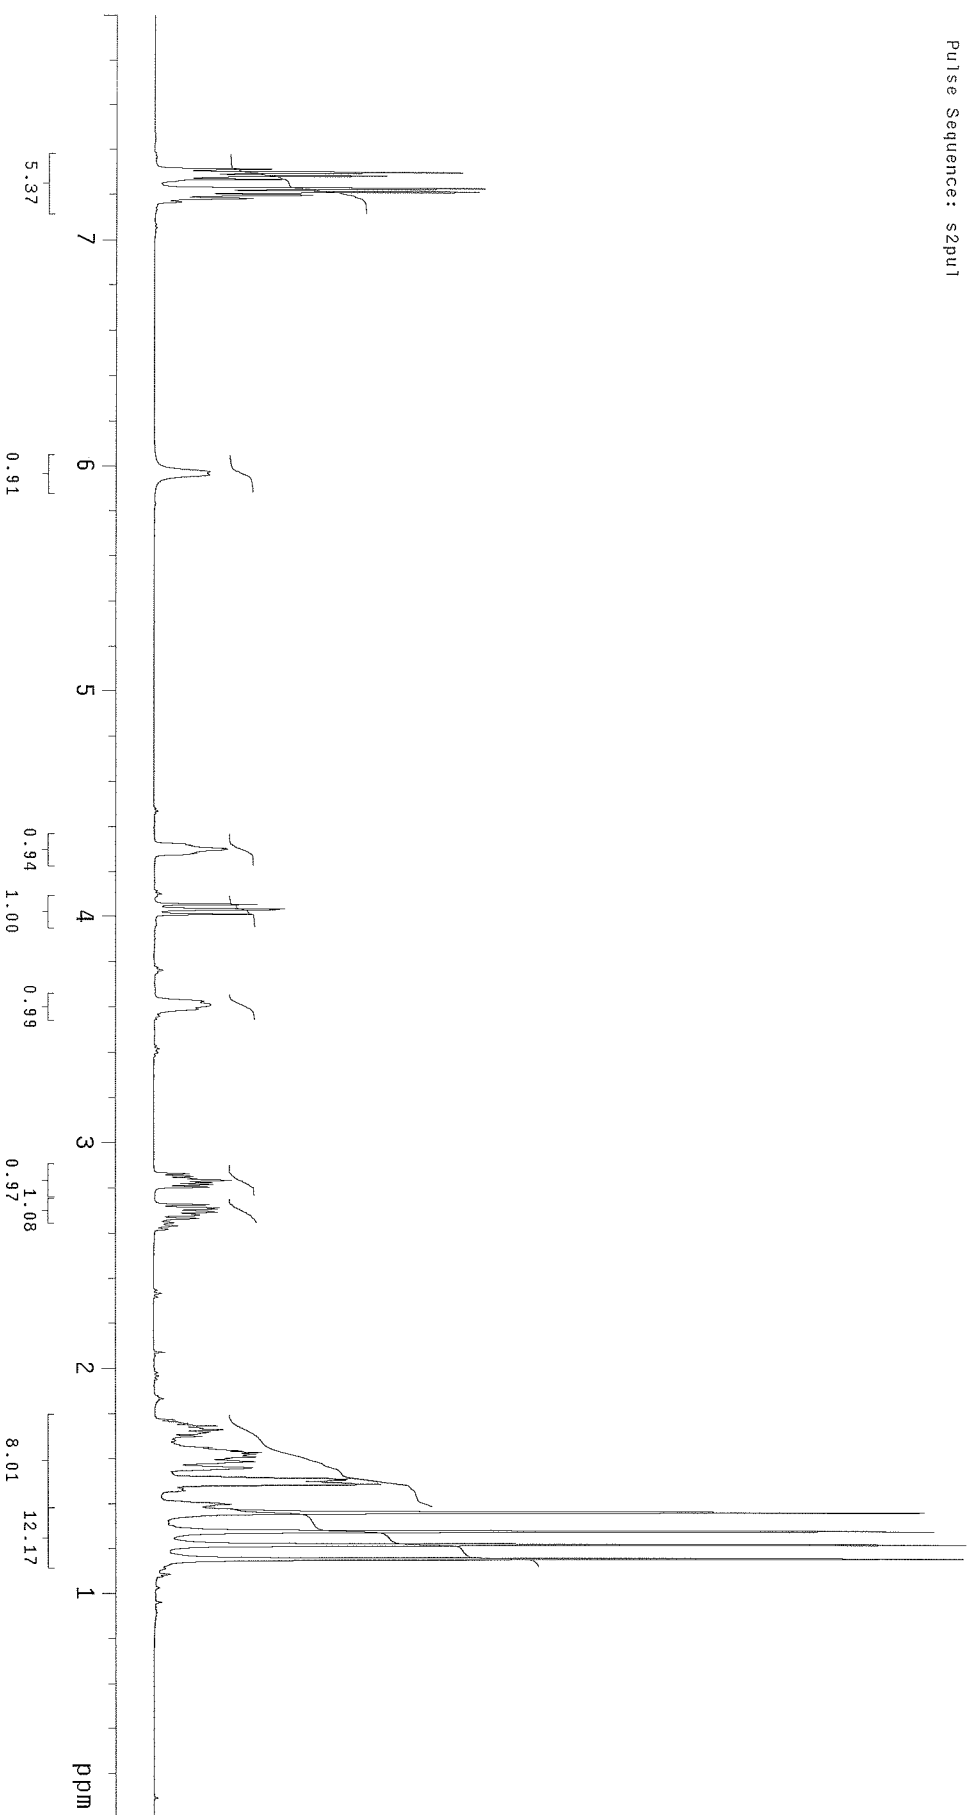

PHCH2CH2CHTEMPCH2OH

Sample directory: eb-chloroform\_01Mar-2000  
File: CARBON

Pulse Sequence: s2pu1

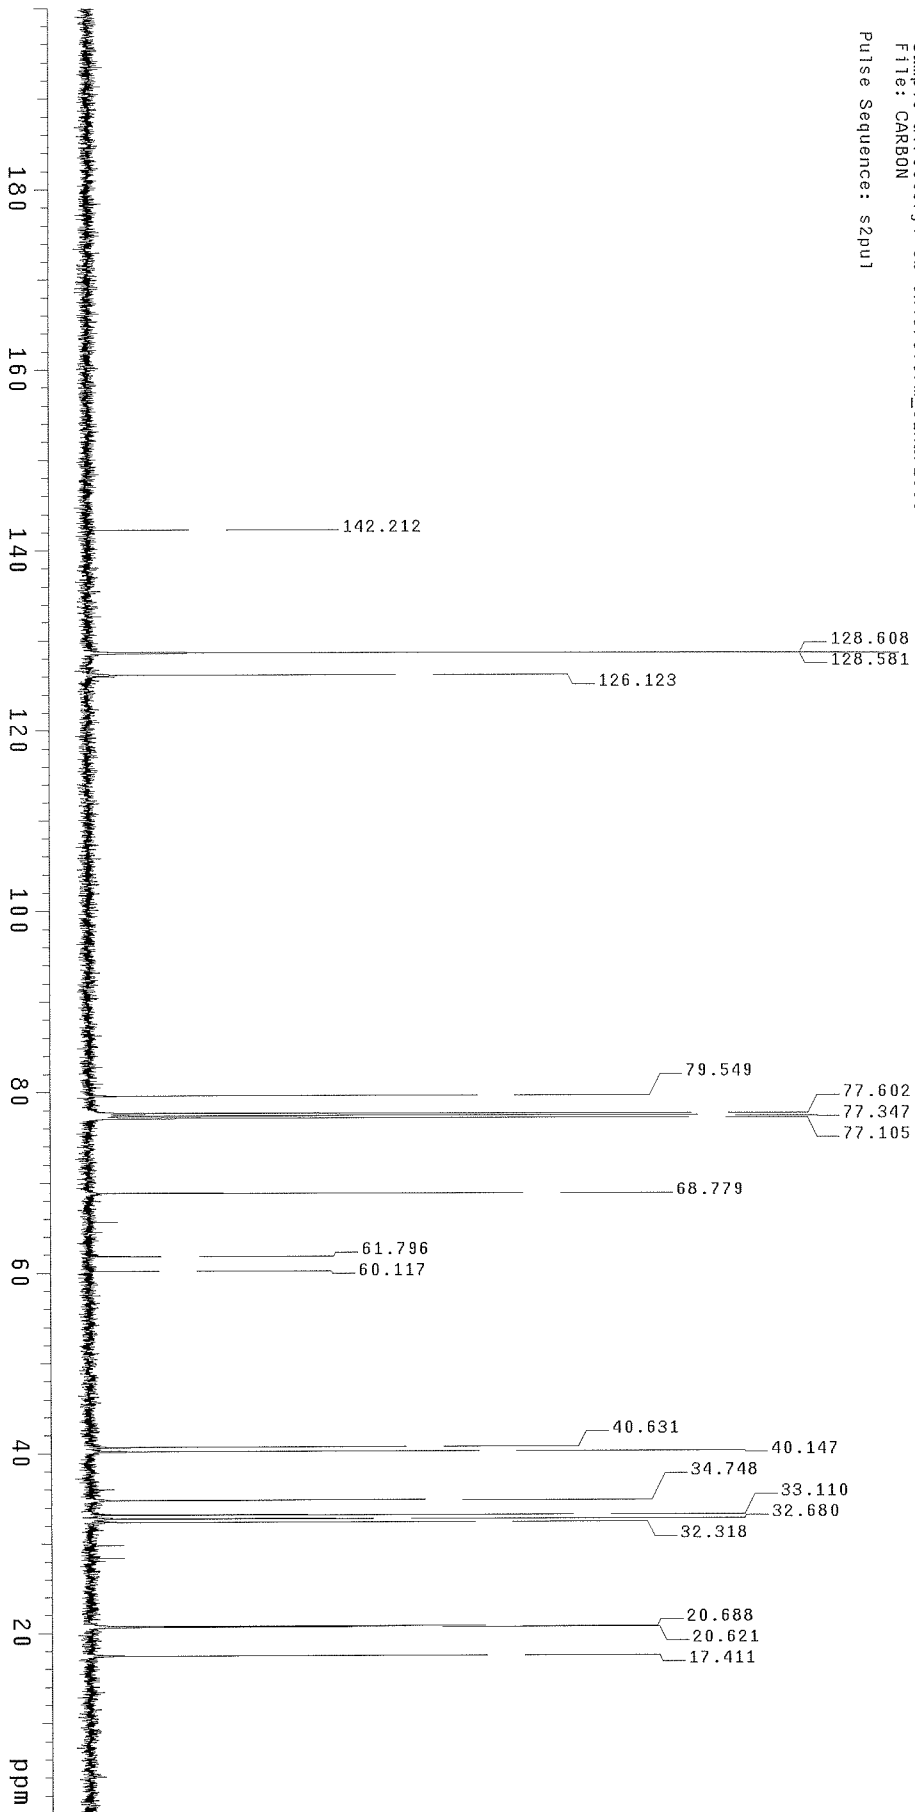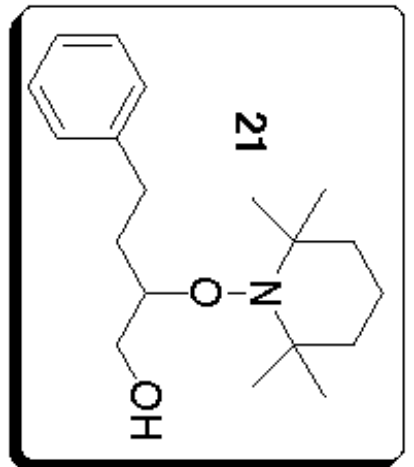

4-MeO06H4CH2CHTEMPOCH2OH

Pulse Sequence: s2pu1

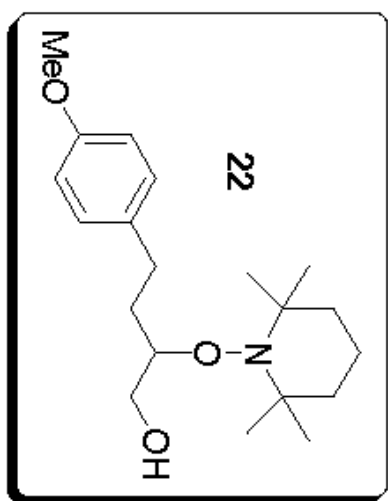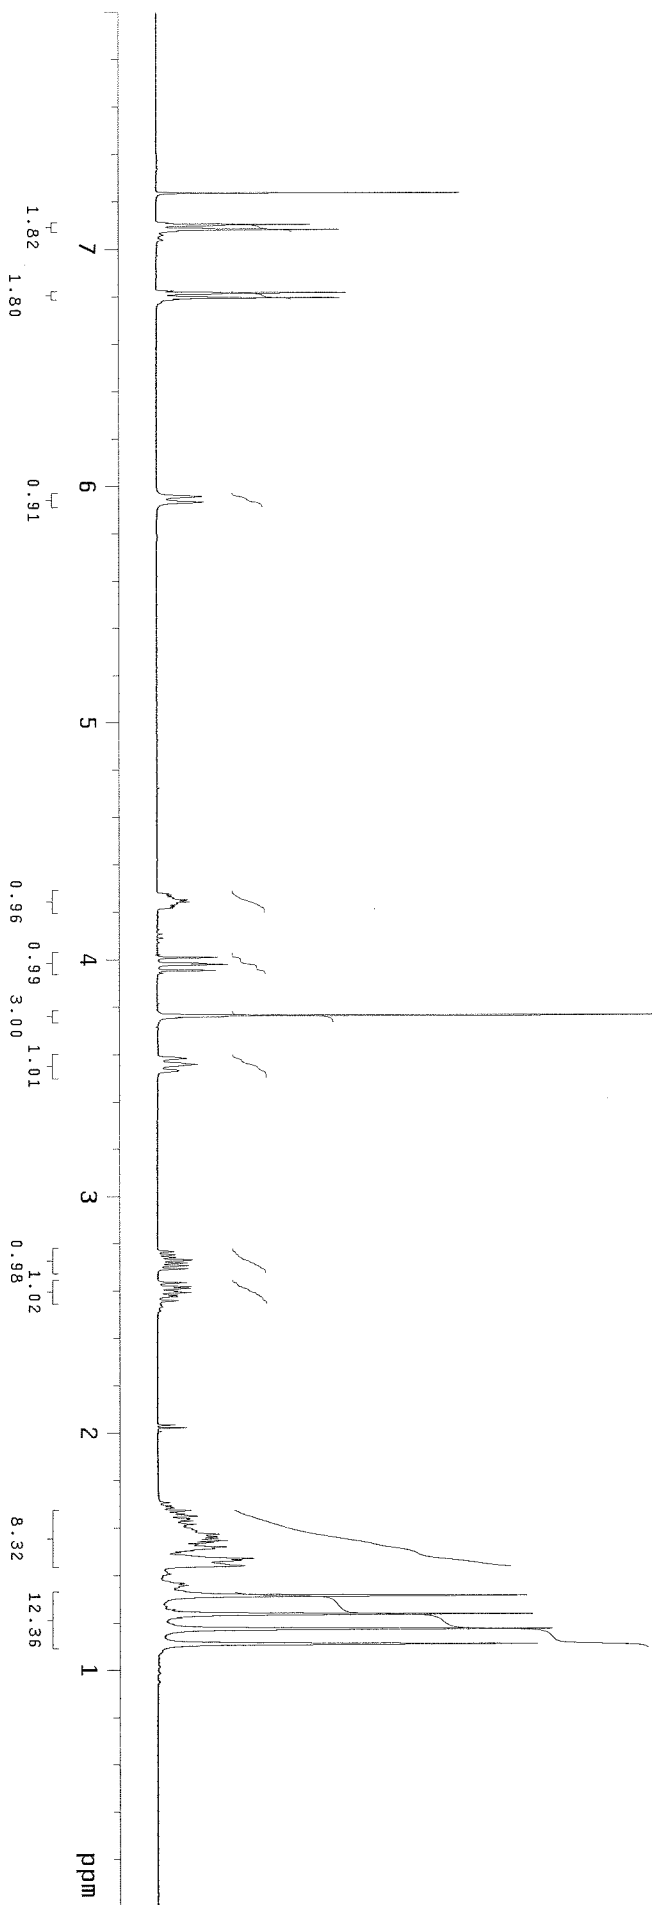

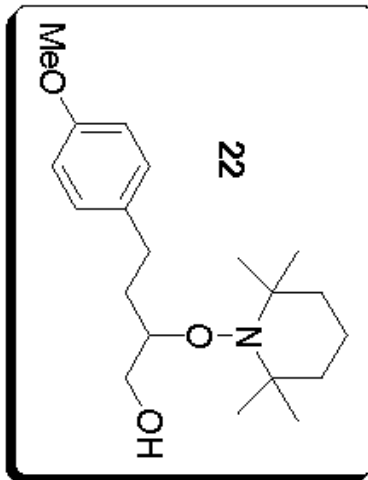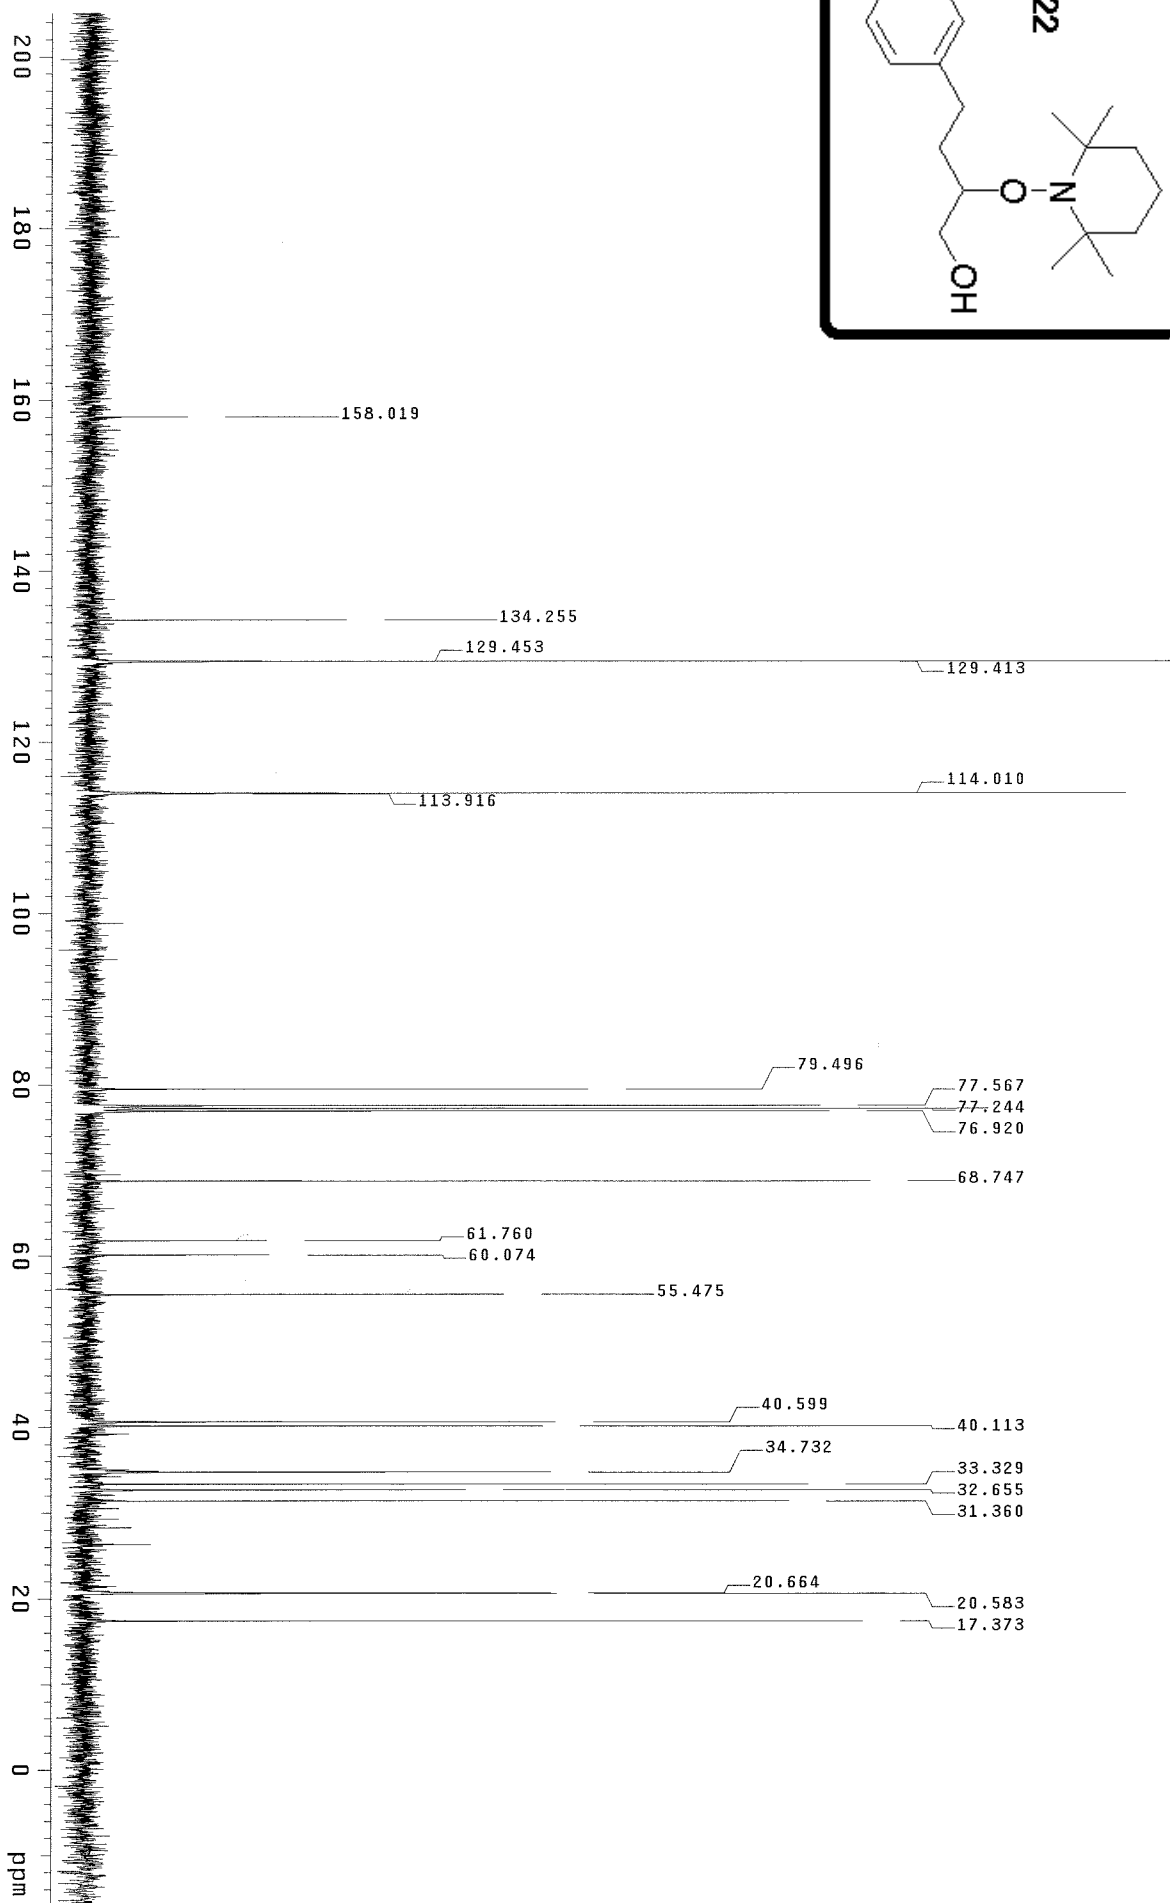

2Me0PhCH2CHTEMPOCH2OH

Sample directory: proton=test\_02Mar2000

File: PROTON

Pulse Sequence: s2pu1

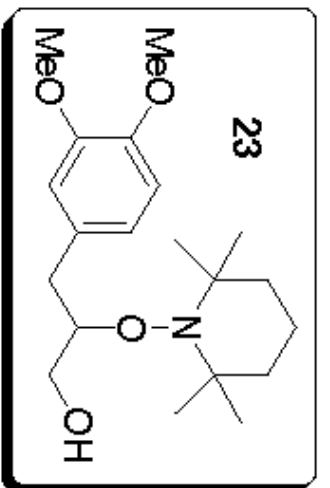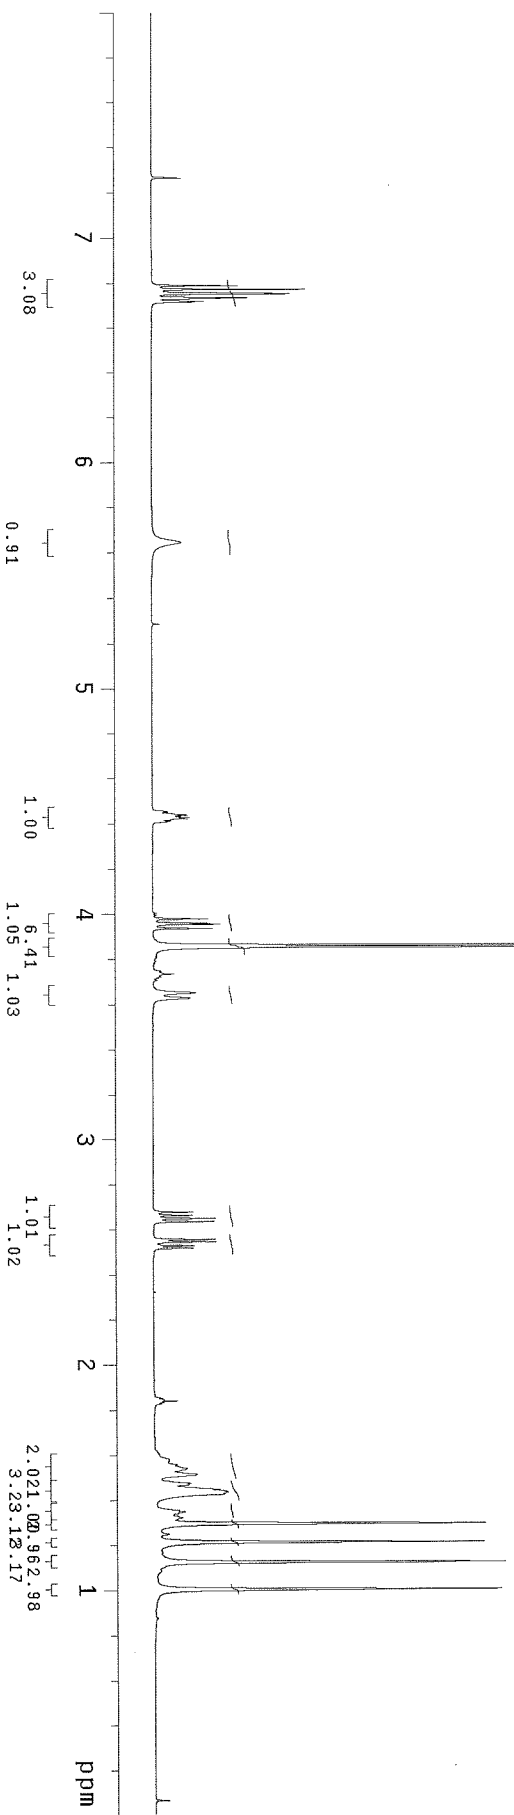

2MeOPhCH2CHTEMPOCH2OH

Sample directory: eb-chloroform\_01Mar2000

File: CARBON

Pulse Sequence: szpul1

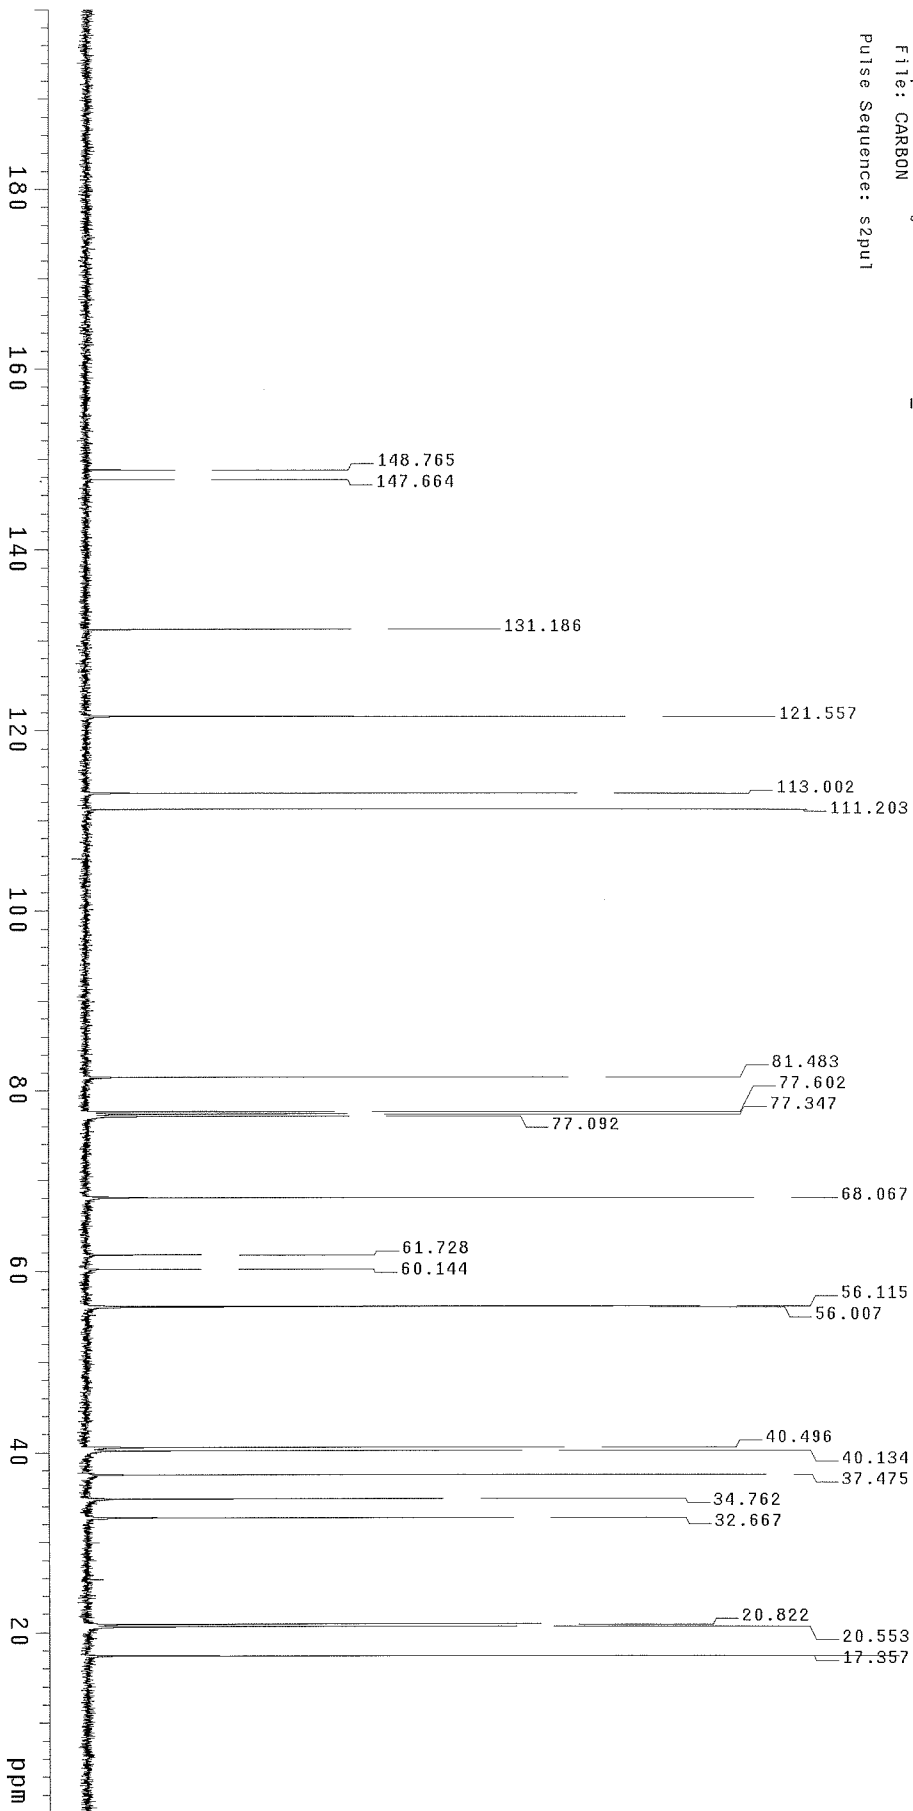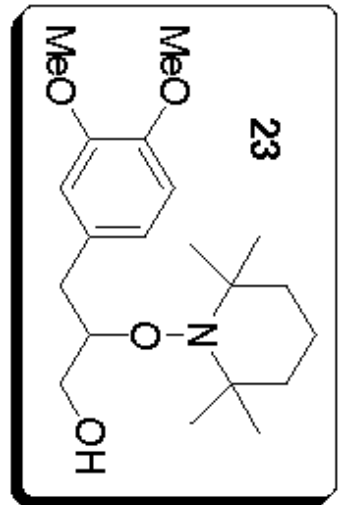

4-NO<sub>2</sub>C<sub>6</sub>H<sub>4</sub>CH<sub>2</sub>CH<sub>2</sub>CNTEMPCH<sub>2</sub>OH

Pulse Sequence: szpu1

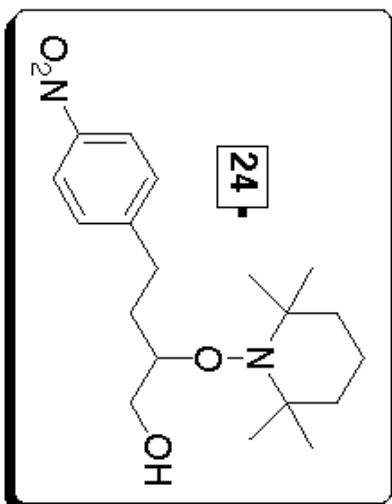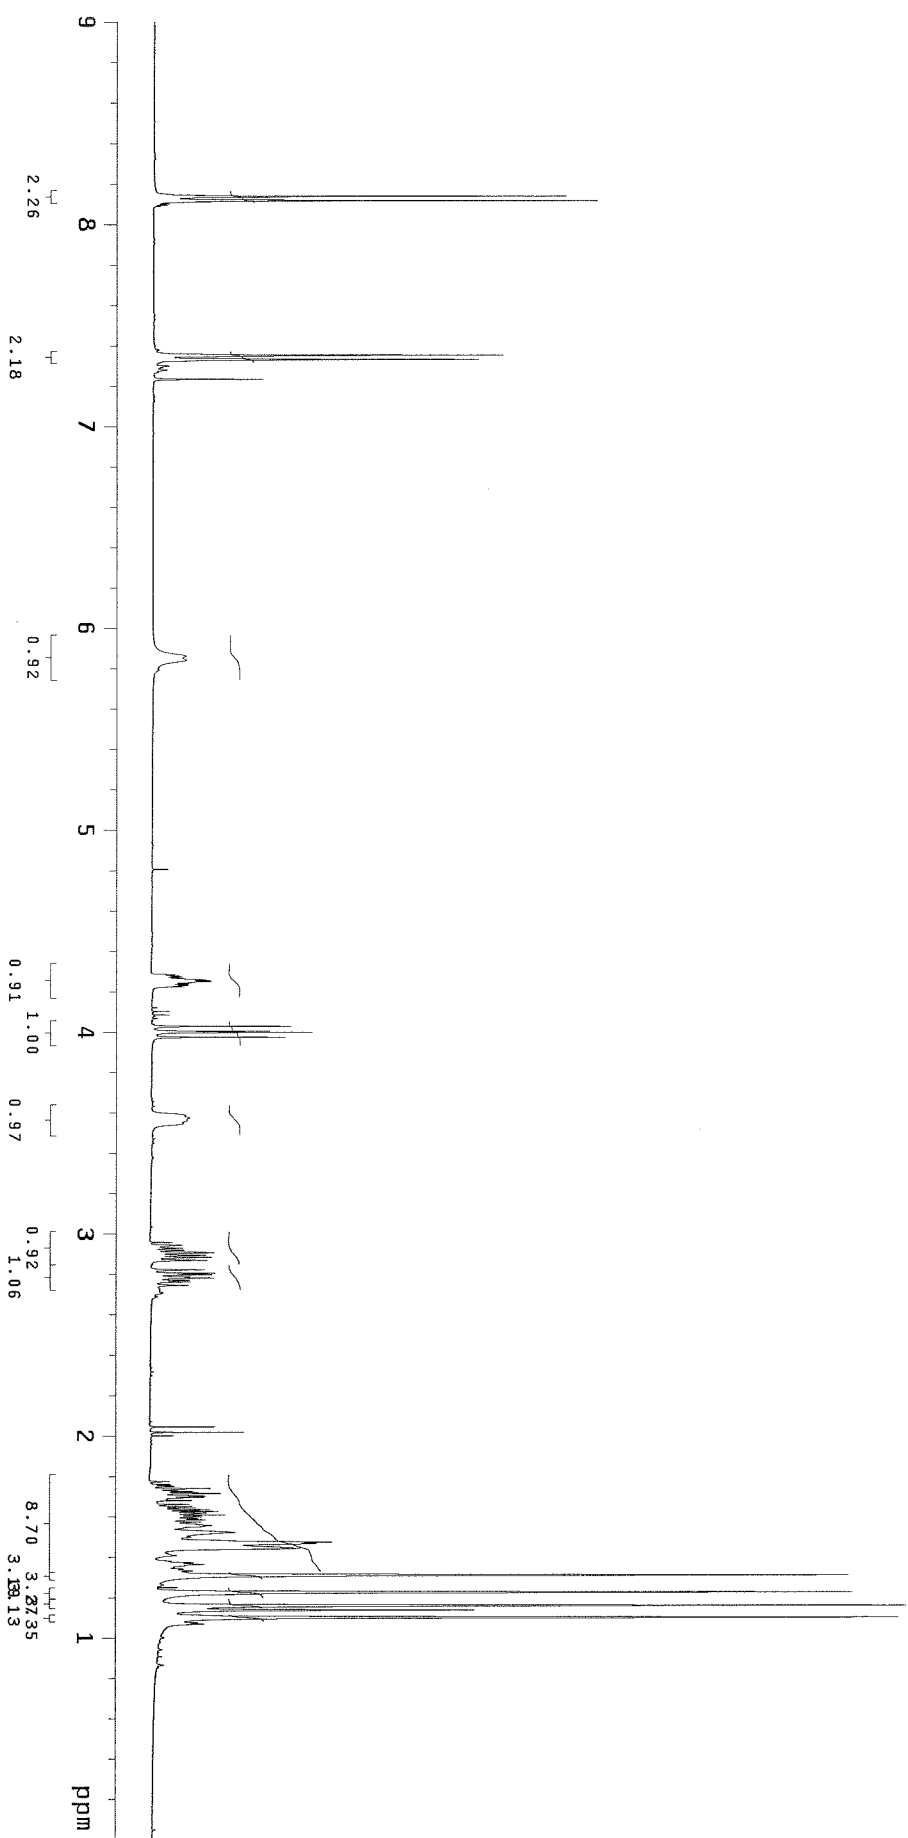

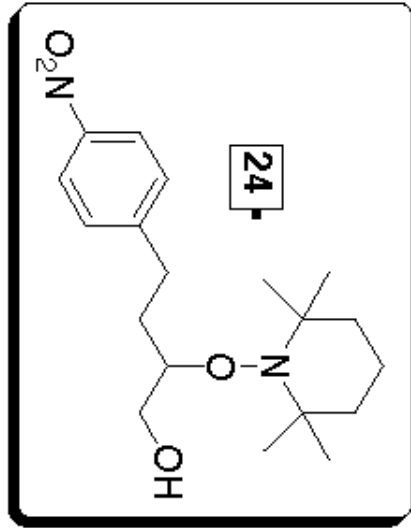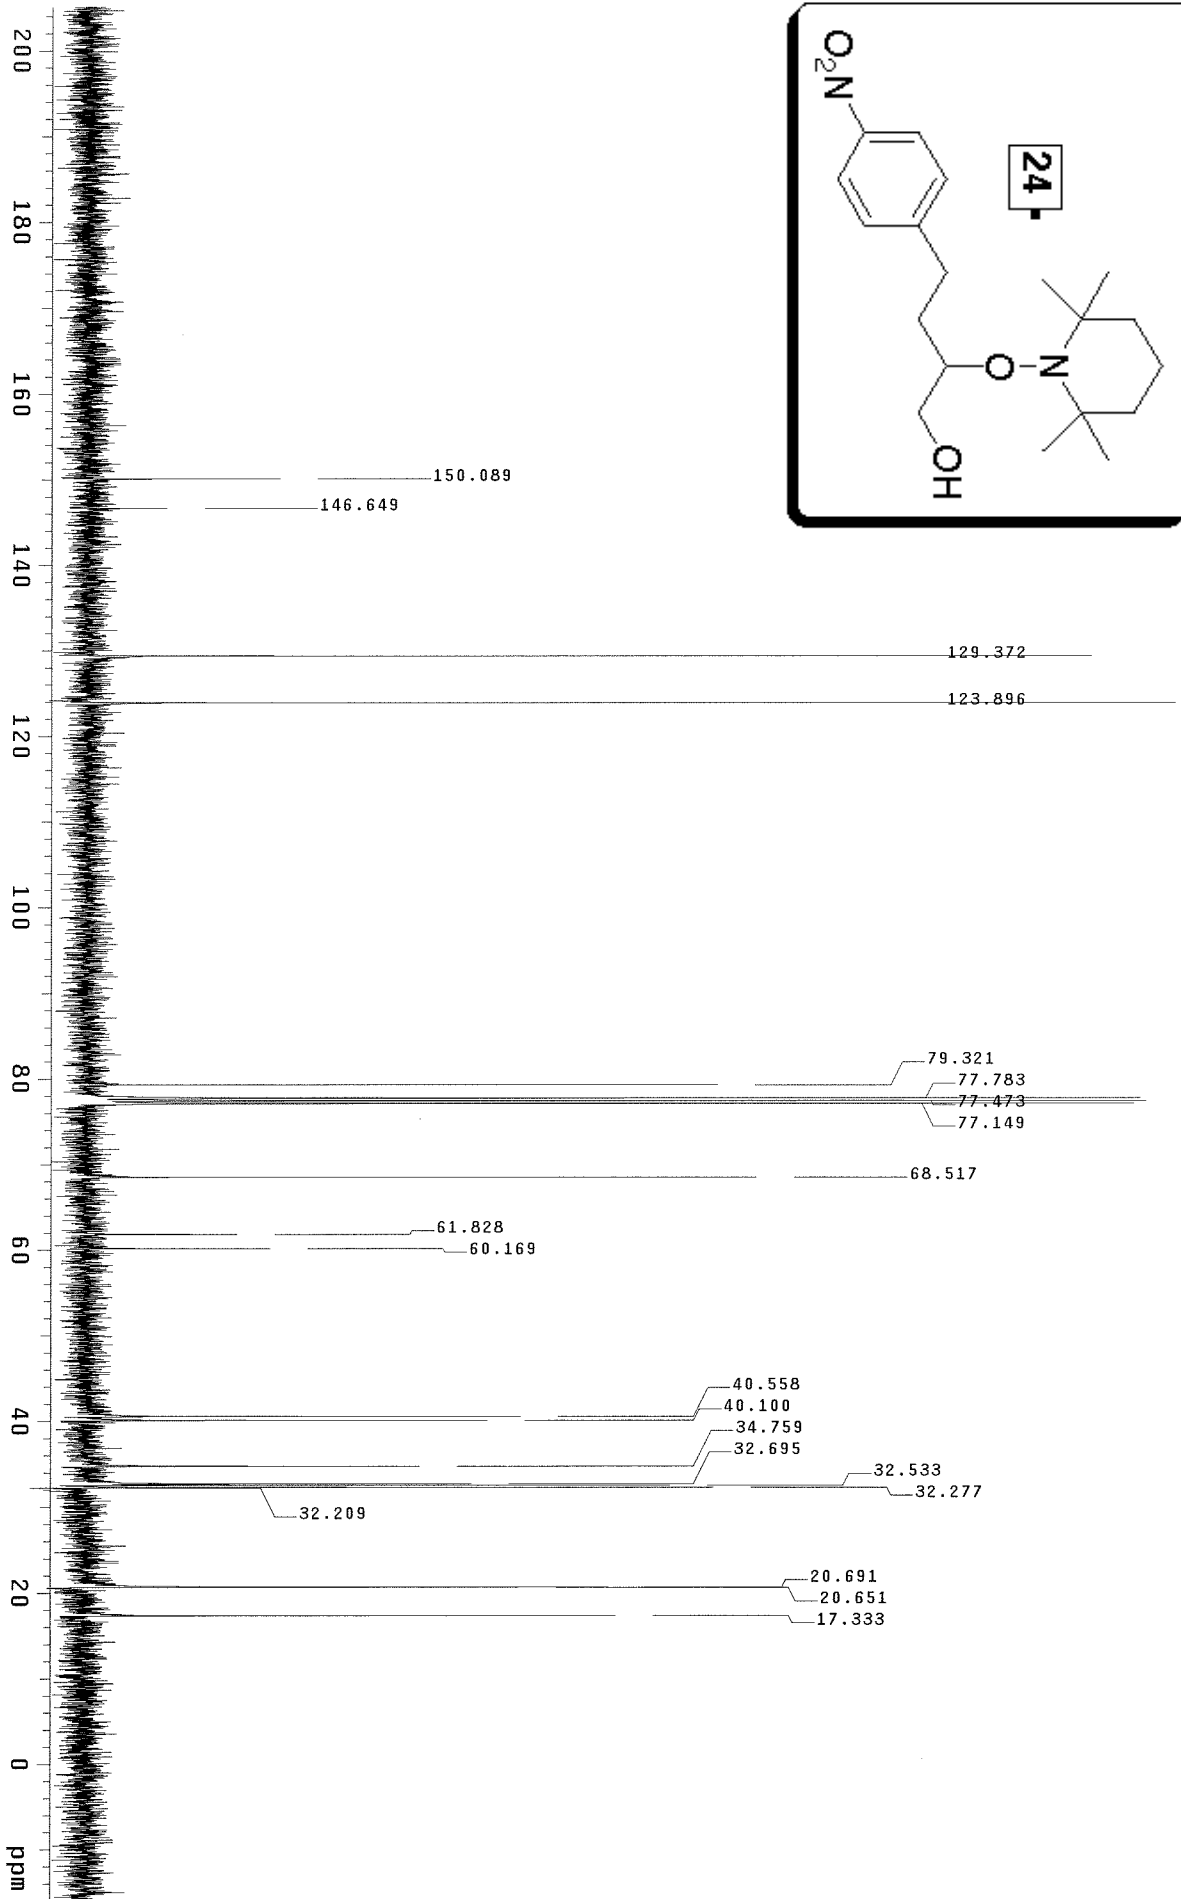



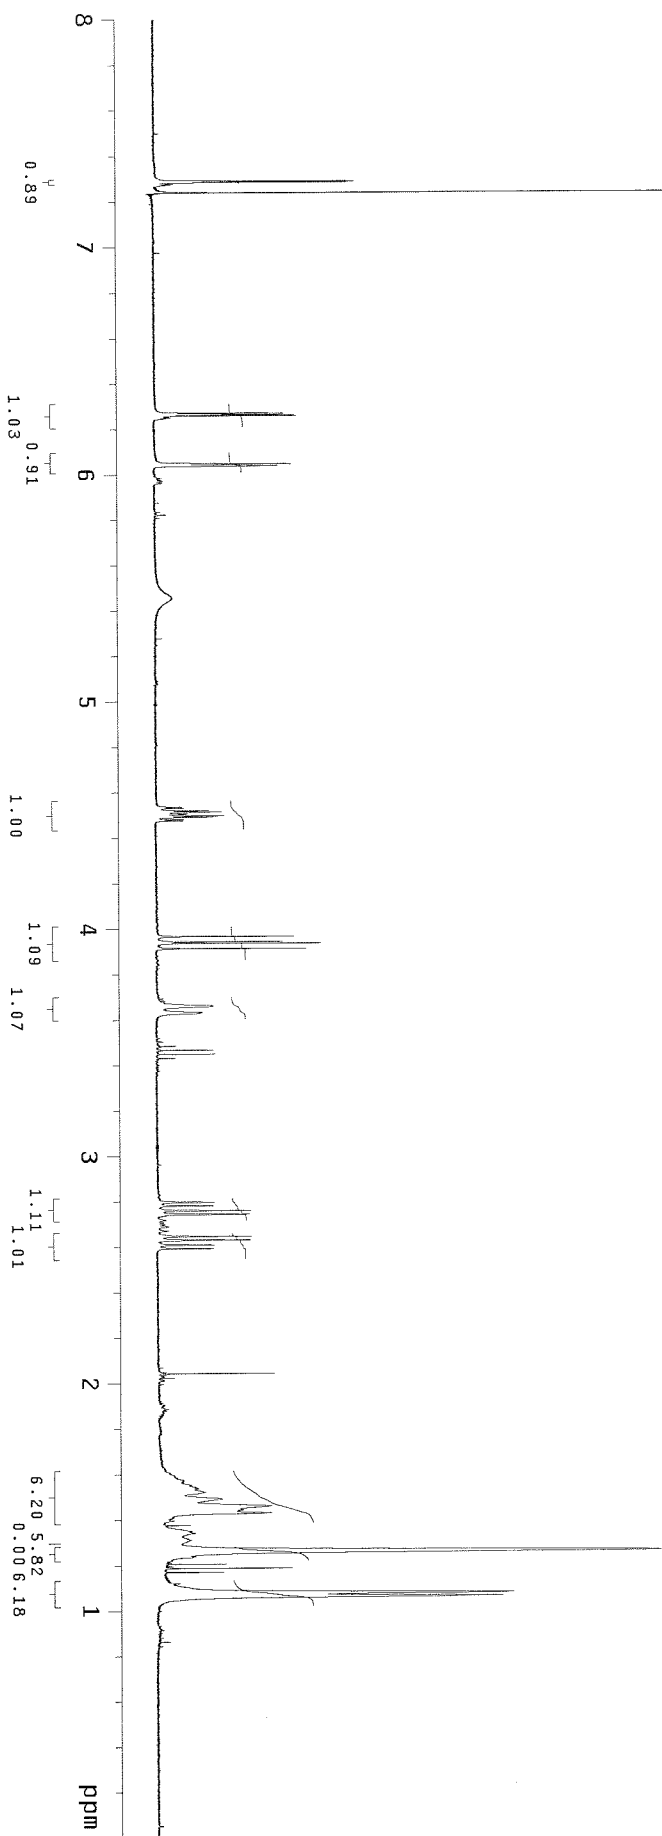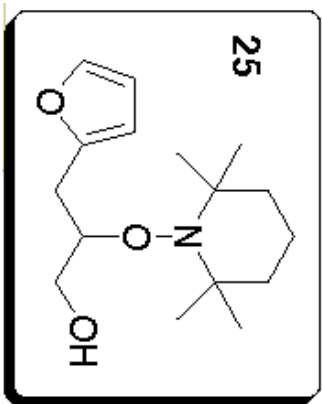

Fury1CH2CHTEMP0CH20H  
Sample directory: eb-chloroform\_01Mar2000  
File: CARBON  
Pulse Sequence: szpu1

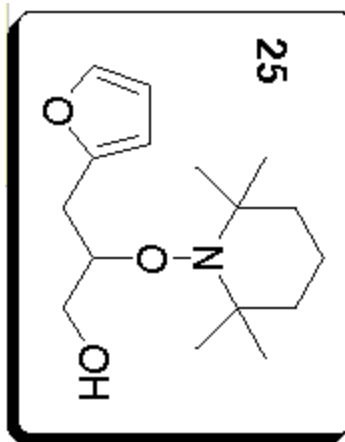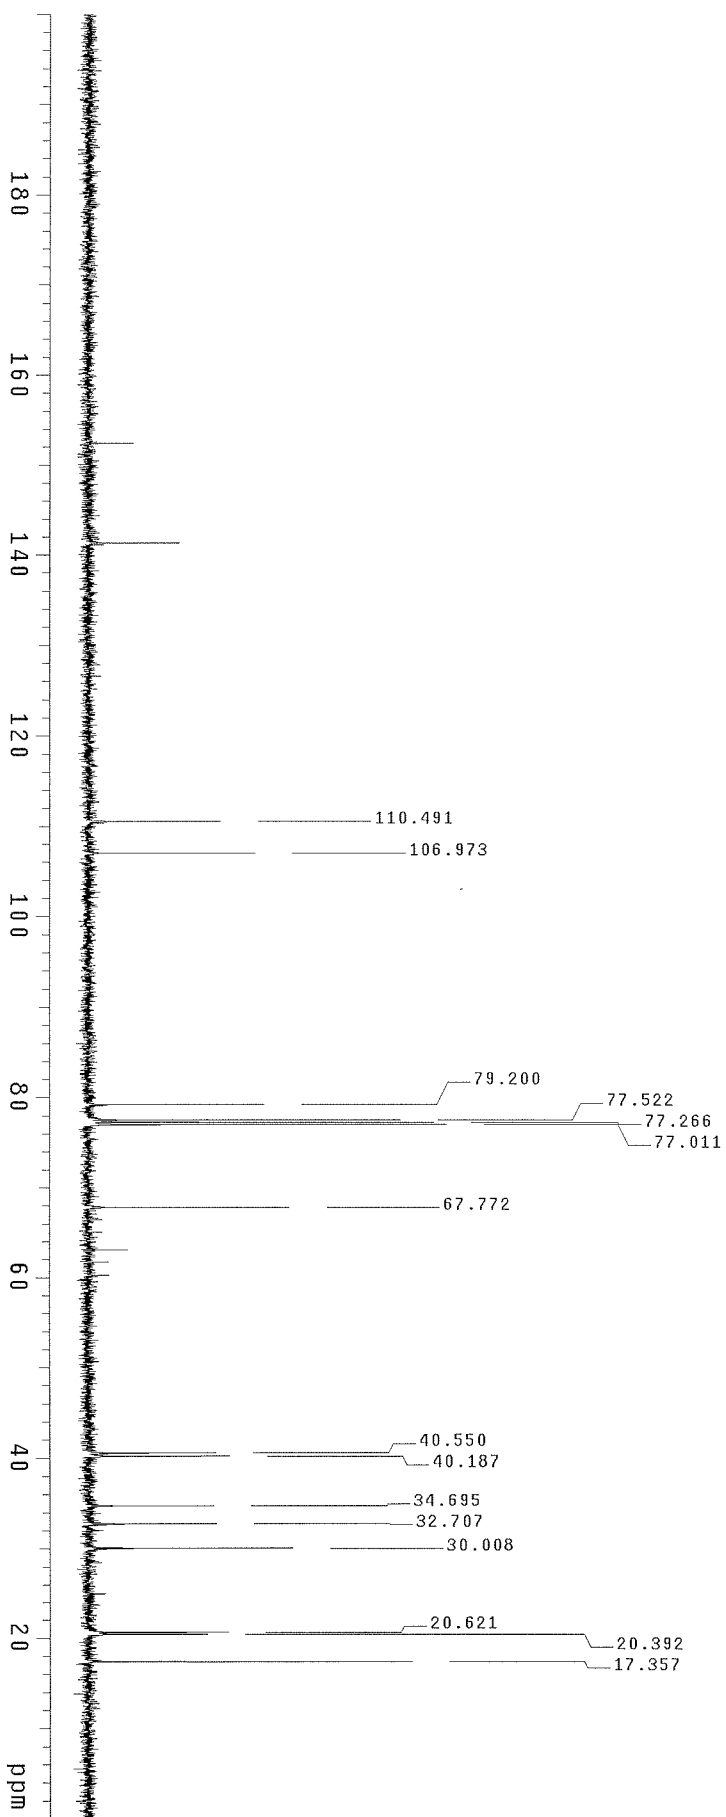

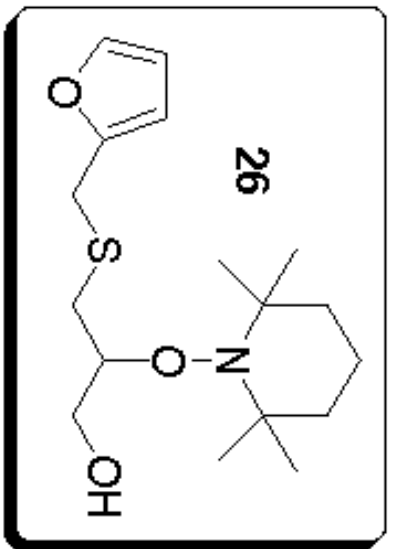

fury1CH2SCH2CHTEMPOCH2OH

Sample directory: proton=test\_02Mar2000

File: PROTON

Pulse Sequence: szpu1

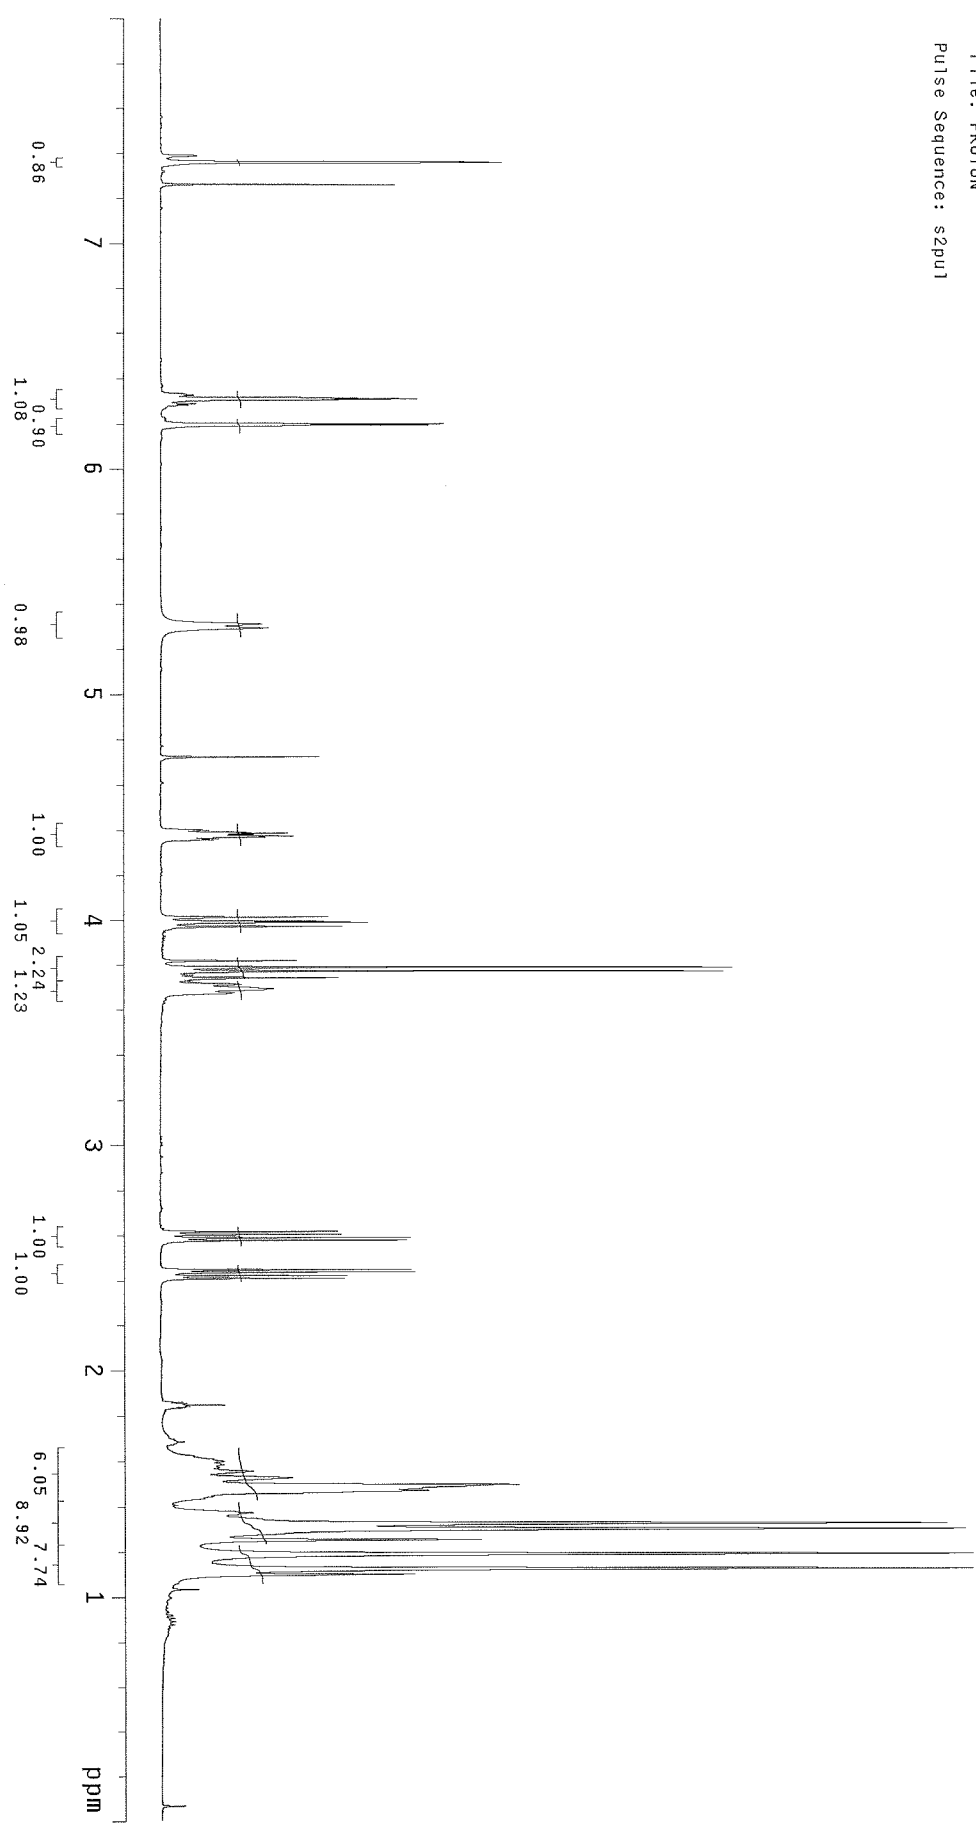

fury1CH2SCH2CHTEMP0CH2OH  
Sample directory: eb-chloroform\_01Mar-2000  
File: CARBON  
Pulse Sequence: s2pu1

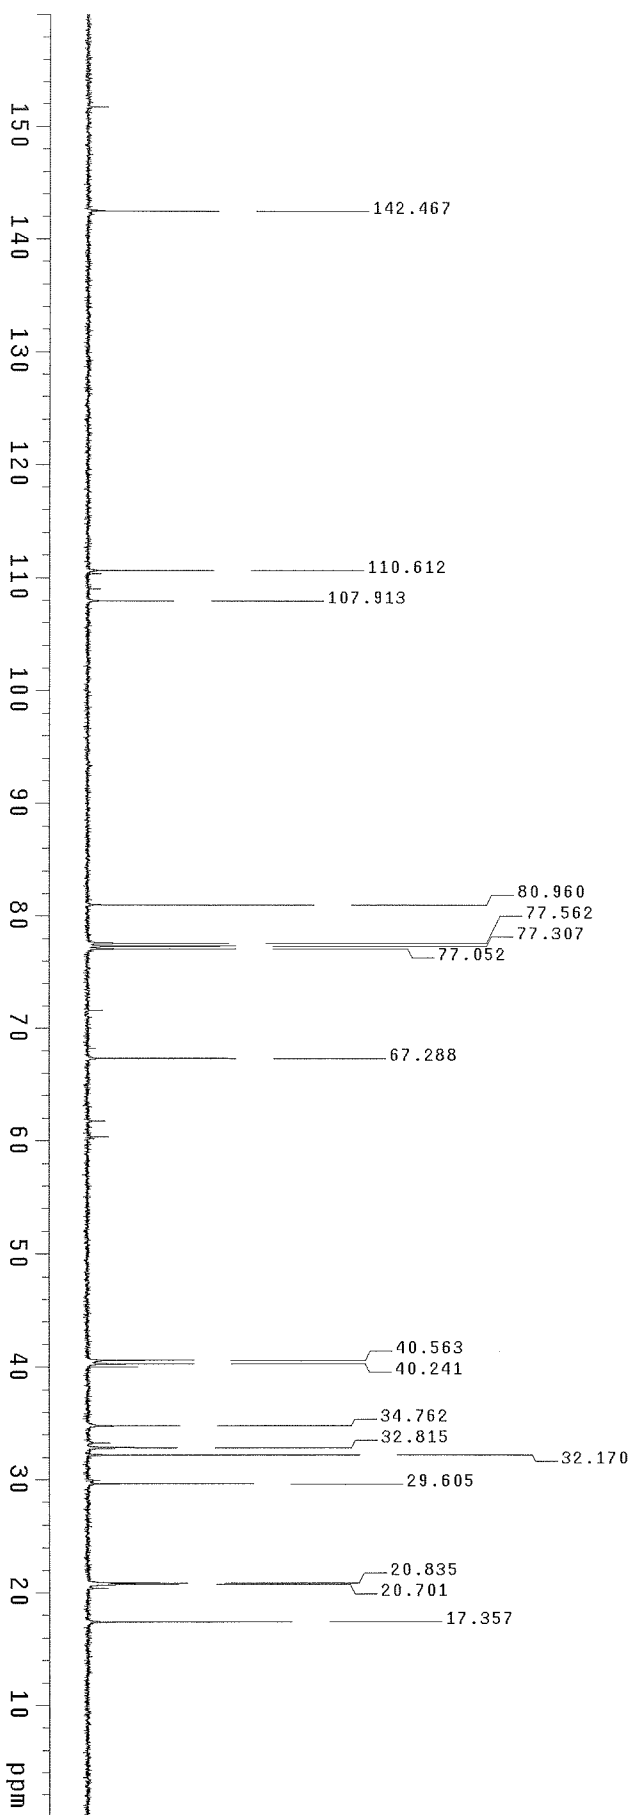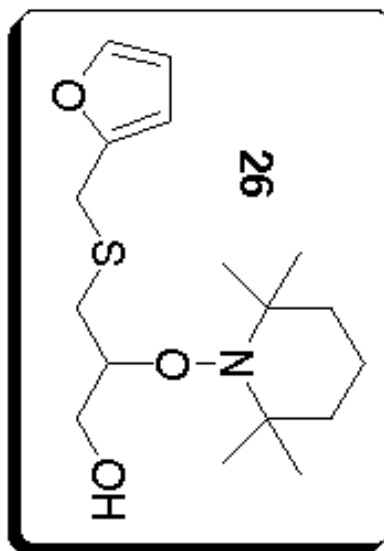

CH2=CHCH2CHTEMPOOH2OH

Sample directory: proton=test\_02Mar2000

Pulse Sequence: s2pu1

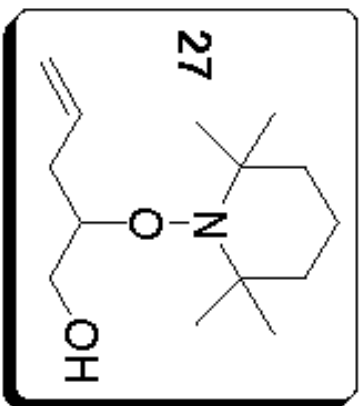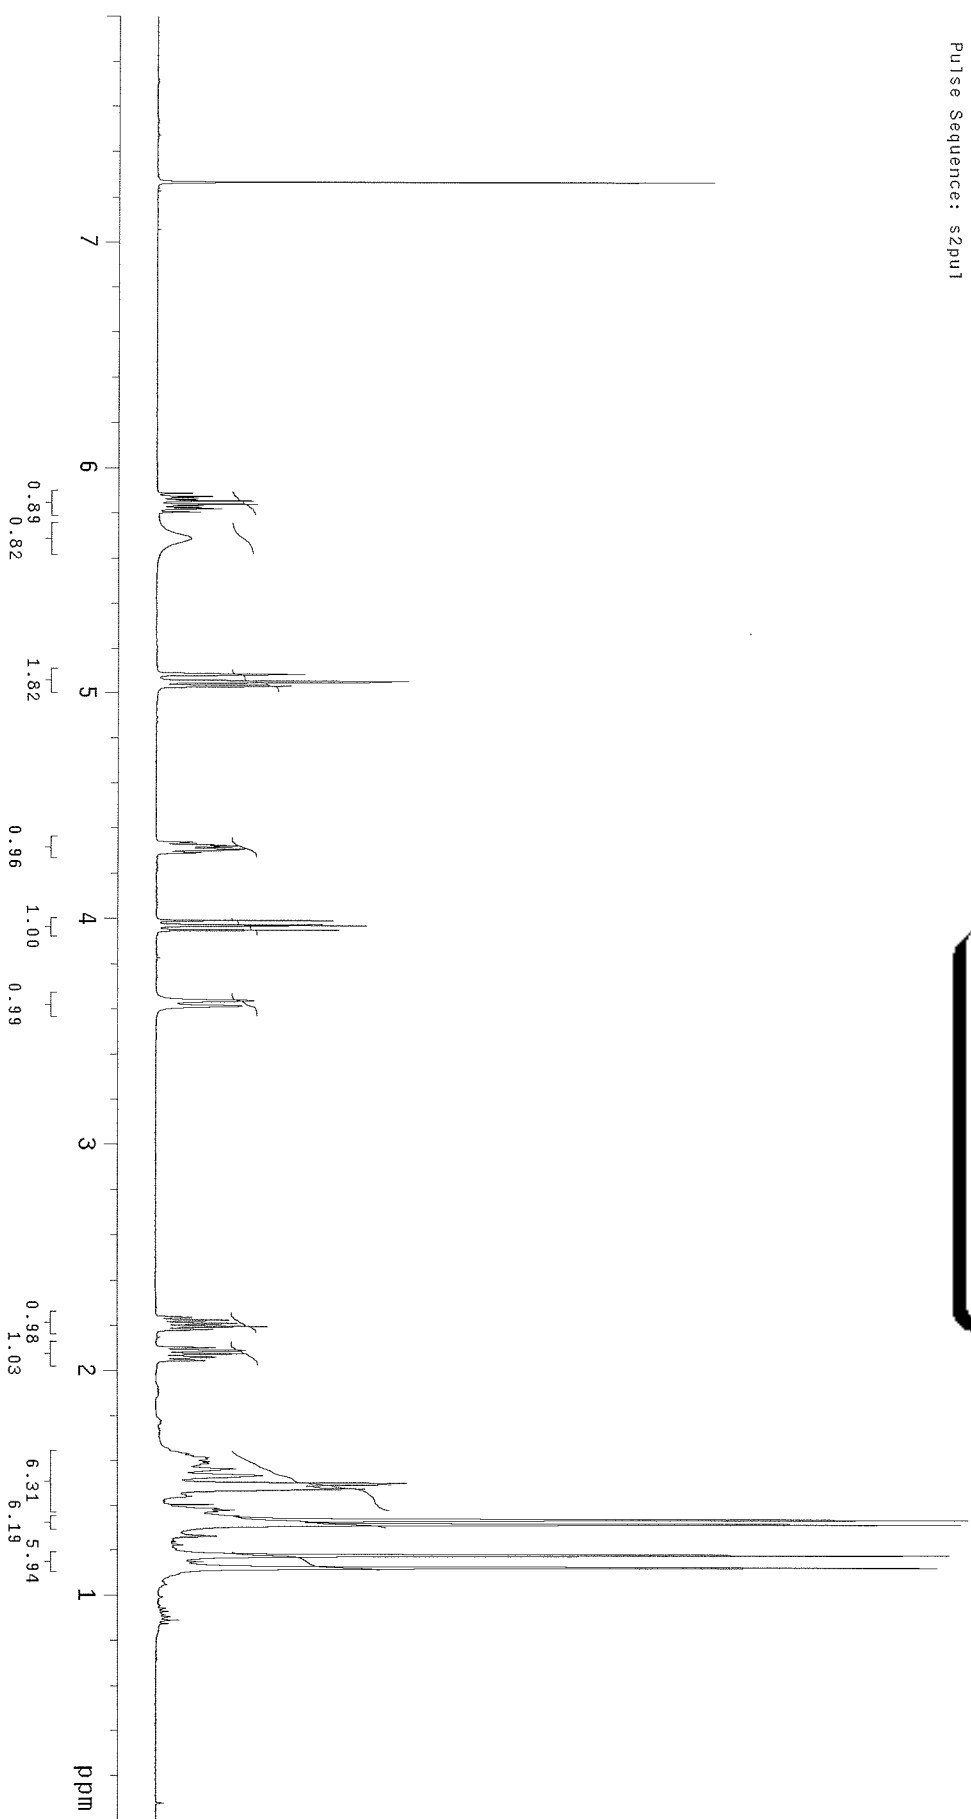

CH2=CHCH2CHTEMPOCH2OH  
Pulse Sequence: s2pu1

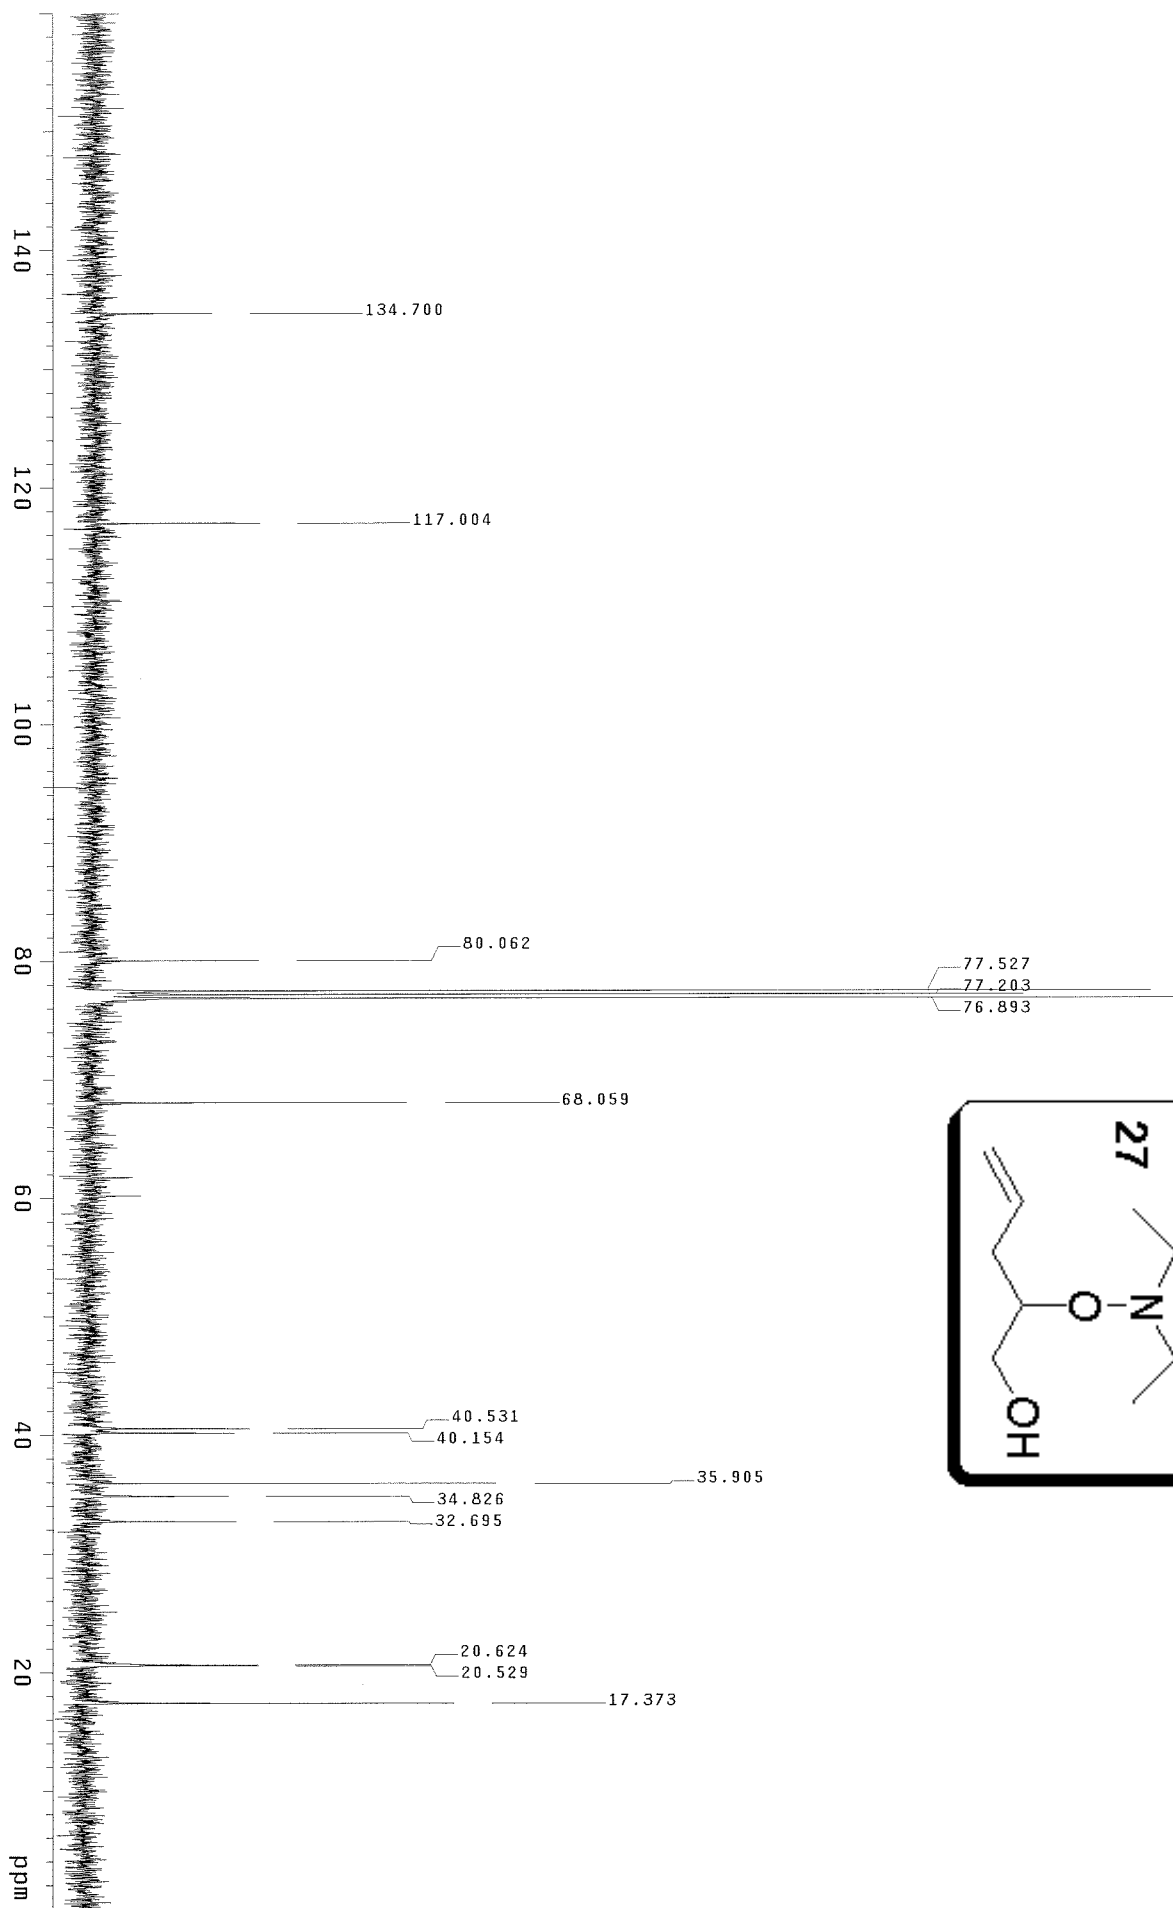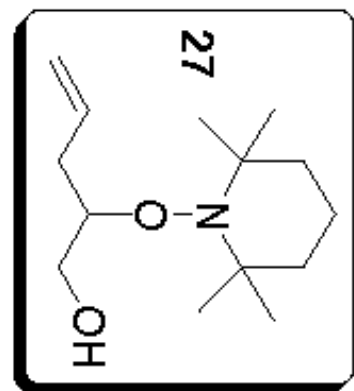

isovare[aldehyde]TEMPO  
Sample directory: proton=test\_02Mar2000  
File: PROTON  
Pulse Sequence: s2pul1

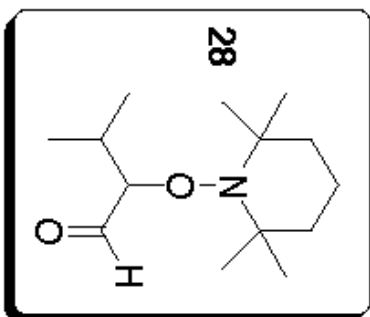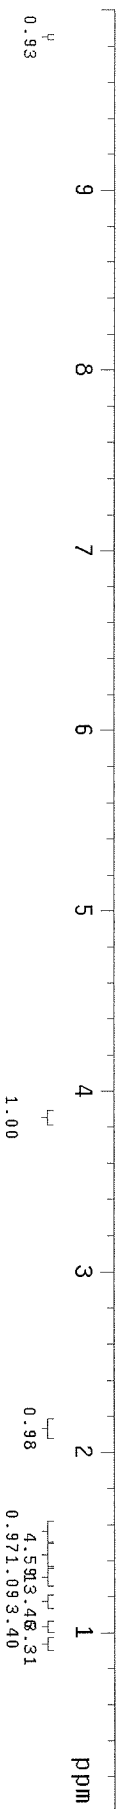

isovaretaldehydeTEMPO  
Sample directory: eb-chloroform\_01Mar2000  
File: CARBON  
Pulse Sequence: s2pu1

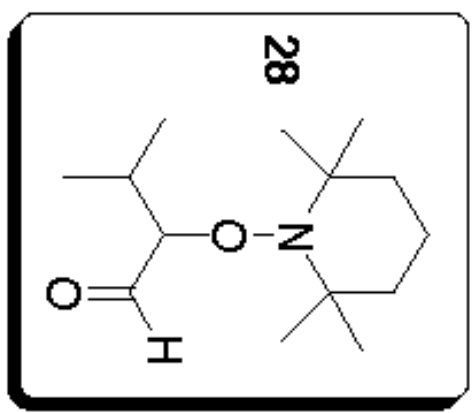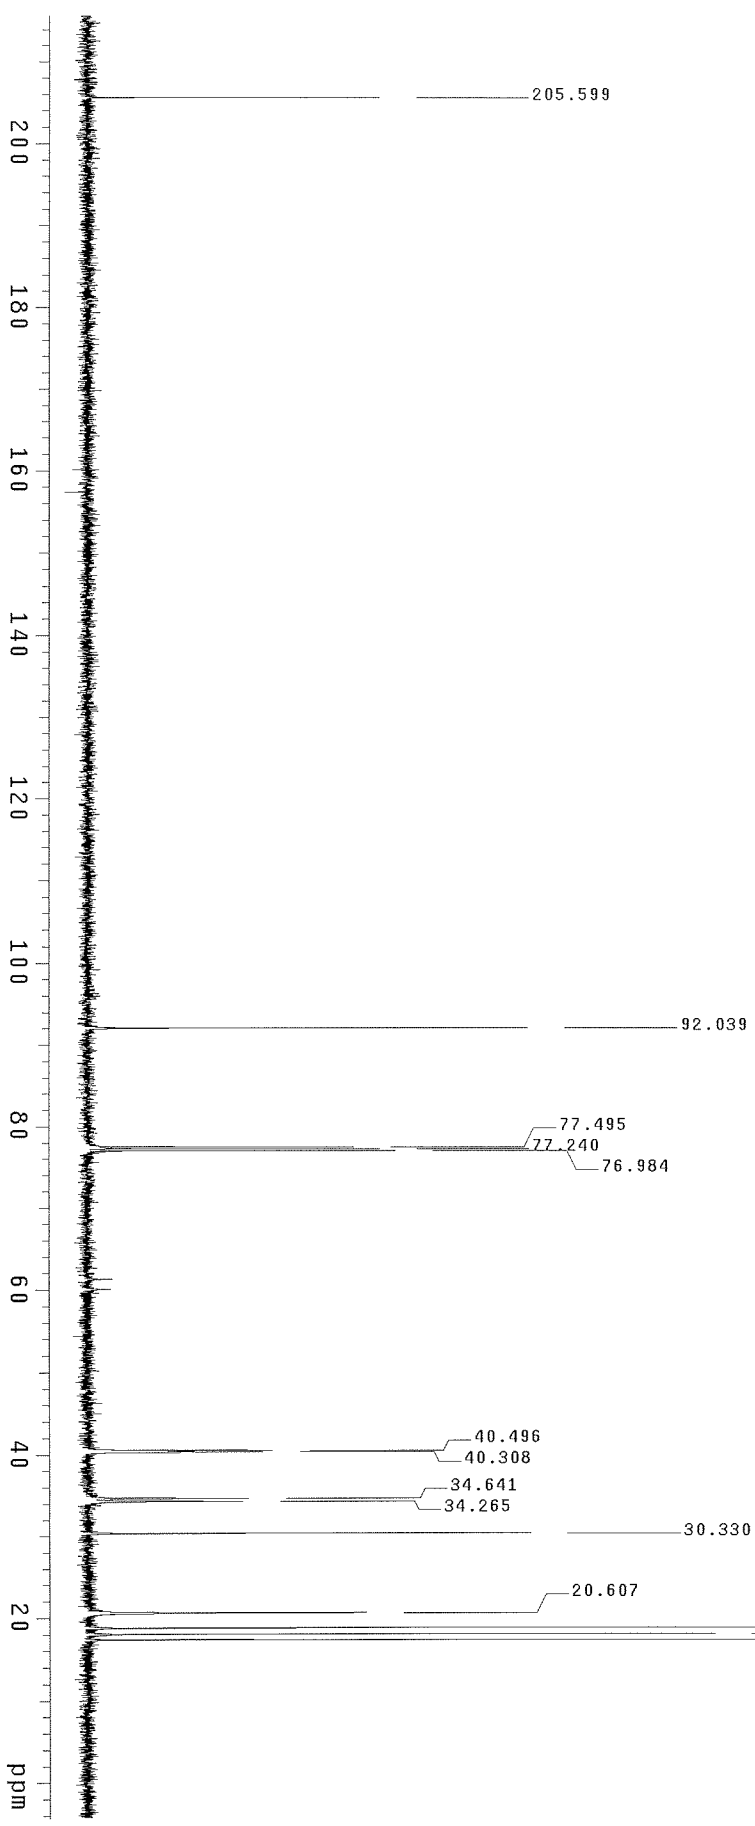



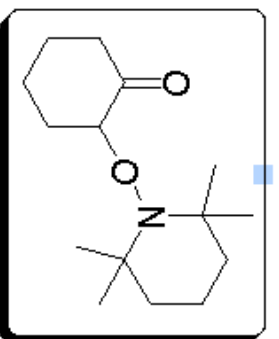

Sample directory: proton=test\_02Mar2000  
File: PROTON  
Pulse Sequence: s2pu1

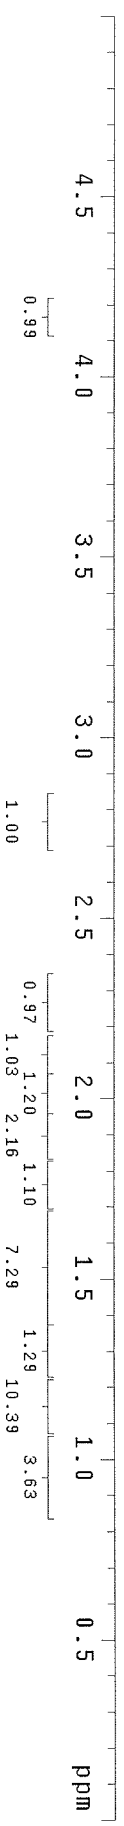

Sample directory: eb-chloroform\_01Mar2000  
File: CARBON  
Pulse Sequence: s2pu1

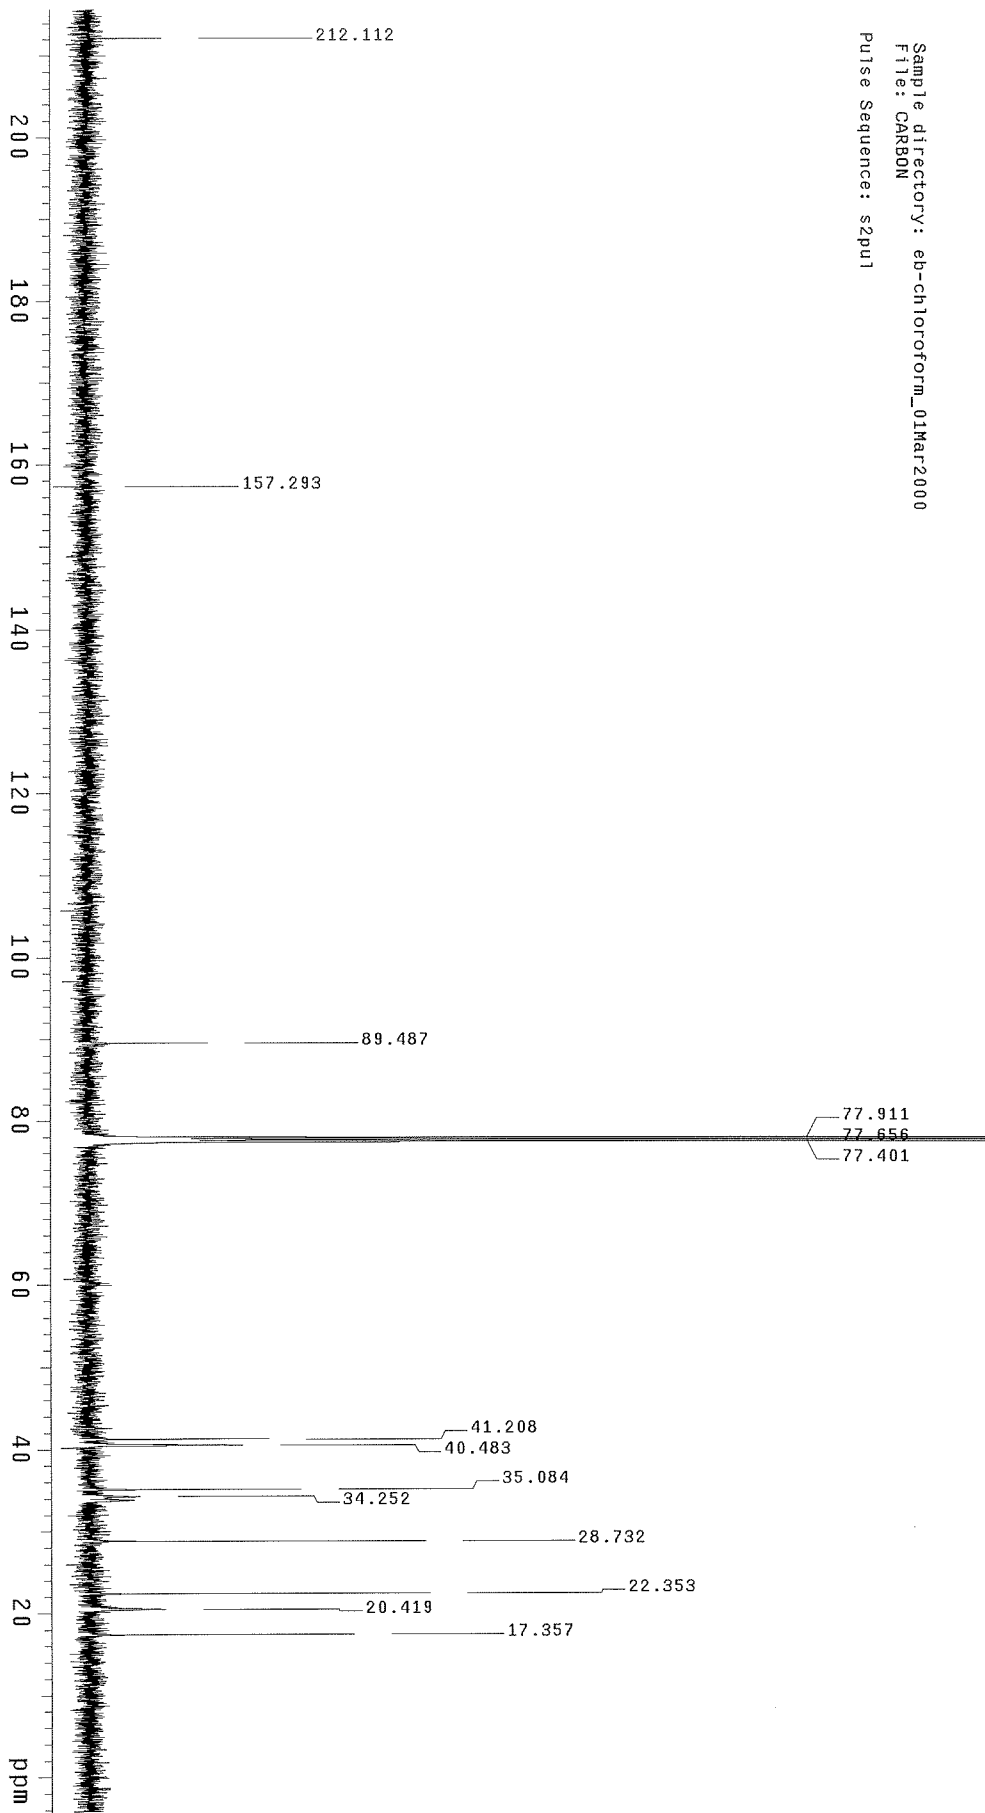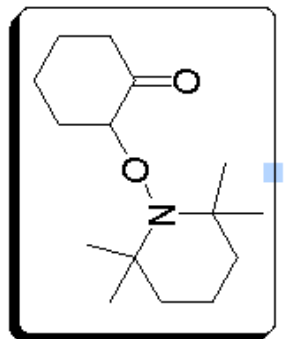

Supplement: NIHMS63734-supplement-3si20070228_04.pdf [file NIHMS63734-supplement-3si20070228_04.pdf]
